# Supplementary material
Source: MDPI journal article supplement (https://www.mdpi.com/2504-4990/4/1/6)
Supplement: s1 [file s1]

Archive with 1 entries (1 files):
- make-1538791-supplementary.pdf
