# Supplementary material
Source: MDPI journal article supplement (https://www.mdpi.com/2504-4990/4/1/6)
Supplement: s1 [file s1 › make-1538791-supplementary.pdf]

# Machine Learning Based Restaurant Sales Forecasting

## (Supplementary Document)

Austin Schmidt<sup>1</sup>, Md Wasi Ul Kabir<sup>1</sup>, and Md Tamjidul Hoque<sup>1,\*</sup>

<sup>1</sup>Department of Computer Science, University of New Orleans, New Orleans, LA 70148, USA; {sbaustin, mkabir4, thoque}@uno.edu

\*Correspondence: thoque@uno.edu; Tel.: +1-504-280-2406

## 1. Holidays

**Supplementary Table S1:** Full List of Included Holidays. A holiday feature uses the index as a numerical identifier. Indexes labeled Single Feature roll for variable lengths of time, so a Boolean field is used separately for them. The holidays are an exhaustive list of any day which may affect sales. The restaurant location has a diverse population, so holidays from many cultures are included. The date of the holiday is included to show which dates are stable and which change yearly. In total, 28 events are considered in the Holiday feature, with four additional as their own feature.

| Index          | Holiday                    | Date                                                                                       |
|----------------|----------------------------|--------------------------------------------------------------------------------------------|
| 0              | None                       | Any other day                                                                              |
| 1              | New Year's Day             | January 1st                                                                                |
| 2              | Martin Luther King Jr. Day | 3rd Monday of January                                                                      |
| 3              | President's Day            | 3rd Monday in February                                                                     |
| 4              | Super Bowl Sunday          | First Sunday in February                                                                   |
| 5              | Valentine's Day            | February 14th                                                                              |
| Single Feature | Carnival Season            | January 6th to Mardi Gras Day                                                              |
| 6              | Mardi Gras Day             | Day before Ash Wednesday                                                                   |
| 7              | Ash Wednesday              | 46 Days before Easter Sunday. Between Feb 4th and March 22nd.                              |
| Single Feature | Lent Fasting               | Starts Ash Wednesday and end 40 days later. Fasting stops on Sundays and St. Patrick's Day |
| 8              | Holika Dahan               | Day before Holi                                                                            |
| 9              | Holi                       | Early to mid-March                                                                         |
| 10             | Saint Patrick's Day        | March 17th                                                                                 |
| 11             | Easter Sunday              | Sunday following the full moon. Late March to mid-April                                    |

|                |                  |                                                                               |
|----------------|------------------|-------------------------------------------------------------------------------|
| 12             | Good Friday      | Friday following Easter                                                       |
| 13             | Cinco de Mayo    | May 5th                                                                       |
| 14             | Mother's Day     | 2nd Sunday in May                                                             |
| 15             | Memorial Day     | Last Monday in May                                                            |
| 16             | Father's Day     | 3rd Sunday in June                                                            |
| 17             | Independence Day | July 4th                                                                      |
| 18             | Labor Day        | 1st Monday in September                                                       |
| 19             | Columbus Day     | 2nd Monday in October                                                         |
| 20             | Diwali           | Late October to Early November. 5 Day celebration where day 3 is the largest. |
| 21             | Halloween        | October 31st                                                                  |
| 22             | Veteran's Day    | November 11th                                                                 |
| 23             | Thanksgiving Day | 4th Thursday in November                                                      |
| 27             | Christmas Day    | December 25th                                                                 |
| 25             | New Year's Eve   | December 31st                                                                 |
| Single Feature | Ramadan          | One full month out of the year.                                               |
| 26             | Eid al Fitr      | End of Ramadan                                                                |
| 28             | Christmas Eve    | December 24th                                                                 |
| Single Feature | Christmas Season | December 1st to December 25th                                                 |

## 2. Model Specifics: Layer Structures & Tuning Parameters

**Supplementary Table S2:** Ensemble learning committee for Stacking Regression. The meta predictor is bolded and listed first, with the committee following. Notice the meta predictor is also a member of the committee.

| Models                  |
|-------------------------|
| <b>Ridge Regression</b> |
| Multi-Layer Perceptron  |
| K-Neighbors Regression  |
| Linear Regression       |
| Extra Trees Regression  |
| Ridge Regression        |

**Supplementary Table S3:** Ensemble learning committee for Voting Regression. Voting has no meta regressor, and so all of the models share equal weight in decision making.

| Models                                |
|---------------------------------------|
| Gradient Boosting Regression          |
| Random Forest Regression              |
| Linear Regression                     |
| Decision Tree Regression              |
| Stochastic Gradient Decent Regression |

1. Dimension Expansion
2. Simple RNN Layer (Number of nodes is 8, and we return sequences)
3. Dropout of 0.4
4. Simple RNN (Number of nodes is 4)
5. Dropout of 0.4
6. Dense Layer (1)
7. Re-Scale for Presentation ( $X_{New}=X*100$ )

**Supplementary Figure S1:** RNN Layer Structure. The implemented RNN structure for all tests.

1. Dimension Expansion
2. Convolutional 1D Layer (32 filters, kernel size 5, stride of 1)
3. Dropout of 0.4
4. LSTM Layer (Number of nodes is 32, and we return sequences)
5. Dropout of 0.4
6. LSTM Layer (Number of nodes is 32)
7. Dropout of 0.4
8. Dense Layer (1)
9. Re-Scale for Presentation ( $X_{New}=X*100$ )

**Supplementary Figure S2:** LSTM Layer Structure. The implemented LSTM structure for all tests.

1. Dimension Expansion
2. GRU Layer (Number of nodes is 32, and we return sequences)
3. Dropout of 0.4
4. GRU (Number of nodes is 32)
5. Dropout of 0.4
6. Dense Layer (1)
7. Re-Scale for Presentation ( $X_{New}=X*100$ )

**Supplementary Figure S3:** GRU Layer Structure. The implemented GRU structure for all tests.

1. Dimension Expansion
2. Convolutional 1D Layer (32 filters, kernel size 5, stride of 1)
3. Dropout of 0.4
4. GRU Layer (Number of nodes is 32, and we return sequences)
5. Dropout of 0.4
6. GRU Layer (Number of nodes is 32)
7. Dropout of 0.4
8. Dense Layer (14)
9. Dense Layer (1)
10. Re-Scale for Presentation ( $X_{New}=X*100$ )

**Supplementary Figure S4:** GRU+ Layer Structure. The implemented GRU+ structure for all tests.

1. Quantile Loss
2. Logging Metrics
3. Input Embeddings
4. Prescalers
5. Static Variable Selection
6. Encoder Variable Selection
7. Decoder Variable Selection
8. Static Context Variable Selection
9. Static Context Initial Hidden LSTM
10. Static Context Initial Cell LSTM
11. Static Context Enrichment
12. LSTM Encoder
13. LSTM Decoder
14. Post-LSTM Gate Encoder
15. Post LSTM Add Norm Encoder
16. Static Enrichment
17. Multihead Attention
18. Post-Attention Gate Norm
19. Pre-Output Layer Norm
20. Output Layer

**Supplementary Figure S5:** General TFT Model Structure. We build six TFT models, but all use this same layer structure. Some layers are static and have no trainable parameters, while the rest will have a variable number of parameters defined by a hyperparameter tuning process.

**Supplementary Table S4:** TFT Hyperparameter Tuning Ranges. A grid search is completed on learning rate, gradient clipping, dropout, hidden size, hidden continuous size, and attention head size to determine the best possible parameters.

| Parameter              | Min Value | Max Value |
|------------------------|-----------|-----------|
| Learning Rate          | 0.001     | 0.1       |
| Gradient Clip          | 0.01      | 1         |
| Dropout                | 0.1       | 0.3       |
| Hidden Size            | 8         | 128       |
| Hidden Continuous Size | 8         | 128       |
| Attention Head Size    | 1         | 4         |

**Supplementary Table S5:** Hyperparameter Tuning One-Day Results (Full Feature Set). Shown are the results for one-day forecasting from all three datasets using the full feature set. In addition, the best result's loss and the number of trainable parameters are included.

| Parameter              | Actual | Daily Difference | Weekly Difference |
|------------------------|--------|------------------|-------------------|
| Learning Rate          | 0.097  | 0.084            | 0.066             |
| Gradient Clip          | 0.529  | 0.044            | 0.020             |
| Dropout                | 0.161  | 0.145            | 0.157             |
| Hidden Size            | 93     | 101              | 22                |
| Hidden Continuous Size | 16     | 46               | 14                |
| Attention Head Size    | 1      | 1                | 4                 |
| Loss                   | 71.84  | 73.32            | 90.26             |
| Trainable Parameters   | 1.1M   | 2.8M             | 229K              |

**Supplementary Table S6:** Hyperparameter Tuning One-Day Results (Reduced Feature Set). Shown are the results for one-day forecasting from all three datasets using the reduced feature set. Tuning results using the ranges defined in Supplementary Table S12. In addition, the best result's loss, the number of features in the reduced set, and the number of trainable parameters are included.

| Parameter              | Actual | Daily Difference | Weekly Difference |
|------------------------|--------|------------------|-------------------|
| Learning Rate          | 0.099  | 0.098            | 0.079             |
| Gradient Clip          | 0.193  | 0.792            | 0.075             |
| Dropout                | 0.105  | 0.289            | 0.215             |
| Hidden Size            | 123    | 116              | 121               |
| Hidden Continuous Size | 122    | 109              | 32                |
| Attention Head Size    | 3      | 2                | 1                 |
| Loss                   | 68.39  | 78.19            | 93.22             |
| # Features             | 17     | 13               | 9                 |
| Trainable Parameters   | 3.0M   | 2.1M             | 968K              |

**Supplementary Table S7:** Hyperparameter Tuning One-Week Results (Full Feature Set). Shown are the results for one-week forecasting from all three datasets using the full feature set. Tuning results using the ranges defined in Supplementary Table S12. In addition, the best result’s loss and the number of trainable parameters are included.

| Parameter              | Actual | Daily Difference | Weekly Difference |
|------------------------|--------|------------------|-------------------|
| Learning Rate          | 0.098  | 0.099            | 0.087             |
| Gradient Clip          | 0.651  | 0.060            | 0.035             |
| Dropout                | 0.151  | 0.270            | 0.236             |
| Hidden Size            | 119    | 128              | 127               |
| Hidden Continuous Size | 9      | 13               | 106               |
| Attention Head Size    | 2      | 3                | 1                 |
| Loss                   | 78.70  | 100.93           | 90.41             |
| Trainable Parameters   | 1.2M   | 3.8M             | 7.9M              |

**Supplementary Table S8:** Hyperparameter Tuning One-Week Results (Reduced Feature Set). Shown are the results for one-week forecasting from all three datasets using the reduced feature set. Tuning results using the ranges defined in Supplementary Table S12. In addition, the best result’s loss, the number of features in the reduced set, and the number of trainable parameters are included.

| Parameter              | Actual | Daily Difference | Weekly Difference |
|------------------------|--------|------------------|-------------------|
| Learning Rate          | 0.098  | 0.099            | 0.093             |
| Gradient Clip          | 0.911  | 0.574            | 0.173             |
| Dropout                | 0.248  | 0.261            | 0.217             |
| Hidden Size            | 122    | 123              | 123               |
| Hidden Continuous Size | 121    | 68               | 21                |
| Attention Head Size    | 2      | 4                | 4                 |
| Loss                   | 67.24  | 92.68            | 95.51             |
| # Features             | 17     | 13               | 9                 |
| Trainable Parameters   | 3.1M   | 1.5M             | 896K              |

### 3. Forecast Test Shapes

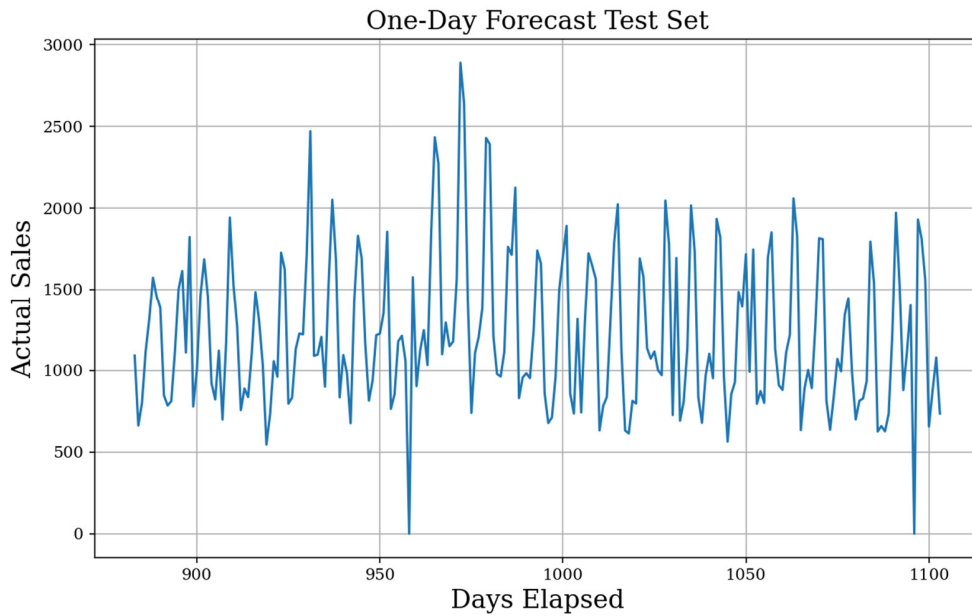

**Supplementary Figure S6 – Shape of Test Data: Actual.** The shape of our test dataset was used for all one-day actual forecasting test tasks. Included are 221 days of sales from the very end of the full dataset.

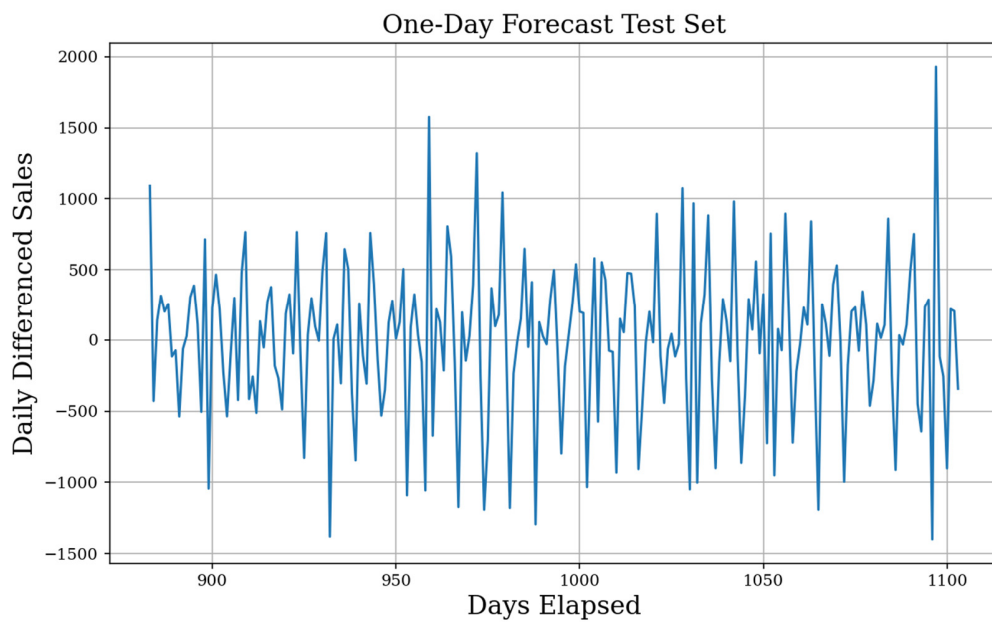

**Supplementary Figure S7: Shape of Test Data: Daily Difference.** The shape of our test dataset used for all one-day daily differenced forecasting test tasks. The test set includes 221 days of sales differenced (2) from the very end of the full dataset. Once a forecast is made, we easily transform it back to Figure S6.

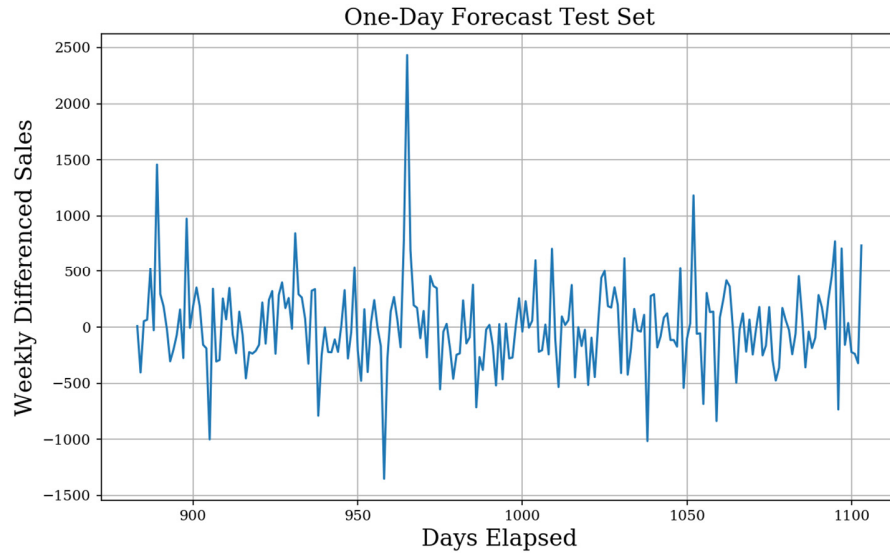

**Supplementary Figure S8:** Shape of Test Data: Weekly Difference. The shape of our test dataset was used for all one-day weekly differenced forecasting test tasks. The test set includes 221 days of sales differenced (3) from the very end of the full dataset. Once a forecast is made, we easily transform it back to Figure S6.

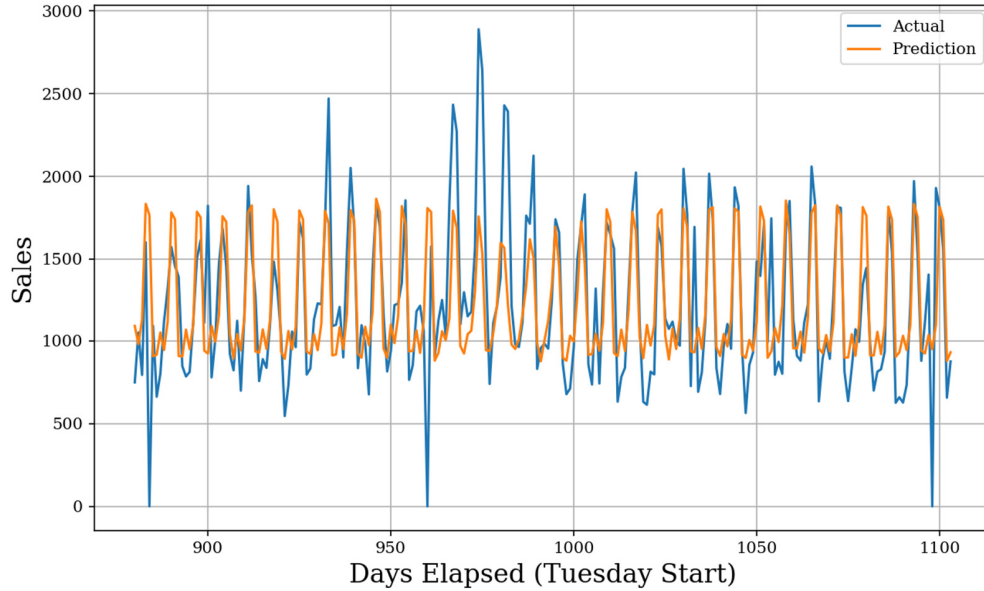

**Supplementary Figure S9:** One-Week Test Set (Start Day Tuesday). The one-week forecasting test set uses a sliding weekday start window. Each day of the week is used as the start for seven tests. The test sets are increased by three to a total of 224 instances, which allows for an exact number of one-week predictions. An additional zero sales holiday is shown at the beginning. Predictions starting on Tuesday are shown as an example.

#### 4. Feature Ranking and Feature Test Results

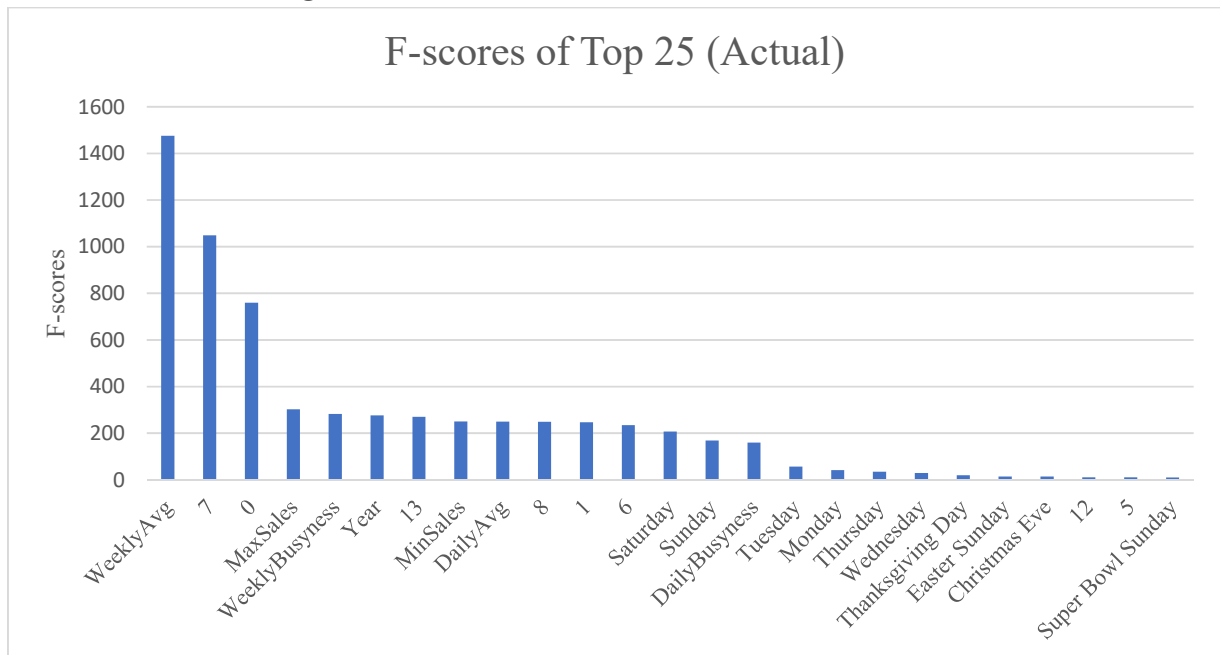

**Supplementary Figure S10:** F-score for Top Features (Actual). The top 25 features as ranked by their F-scores. Weekly sales average is the highest scoring feature by far with other statistical metrics and days of the week following.

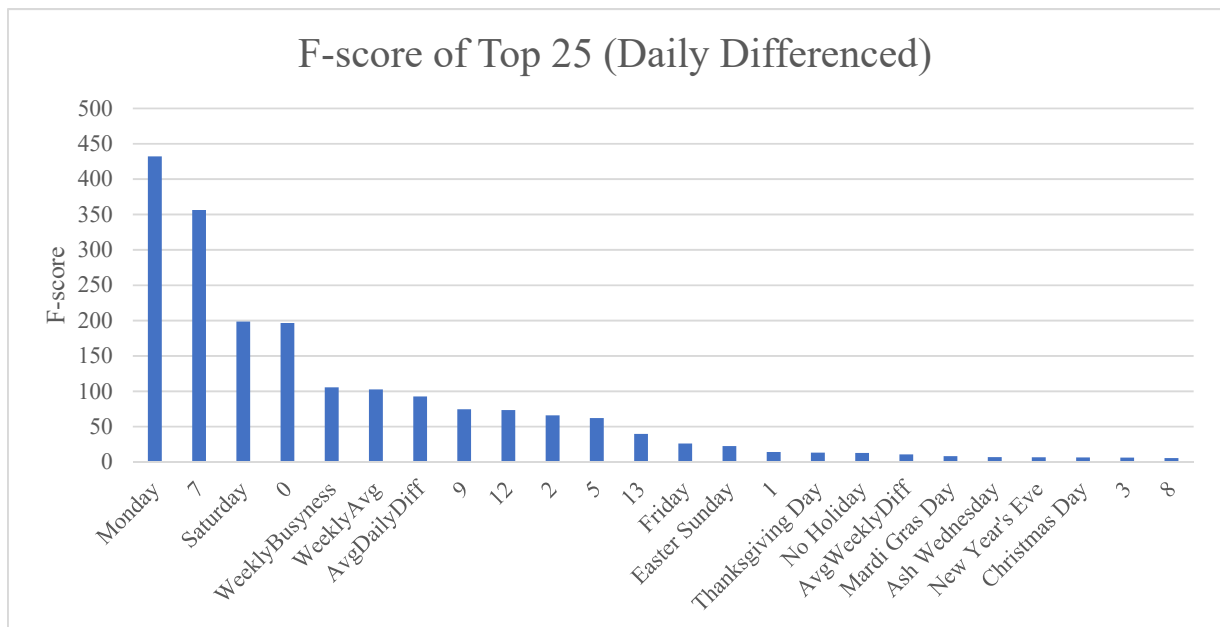

**Supplementary Figure S11:** F-score for Top Features (Daily Differenced). The top 25 features as ranked by their F-scores. The day of the week and some statistical measures are high-ranking features here. Some impactful holidays also are in the top 25.

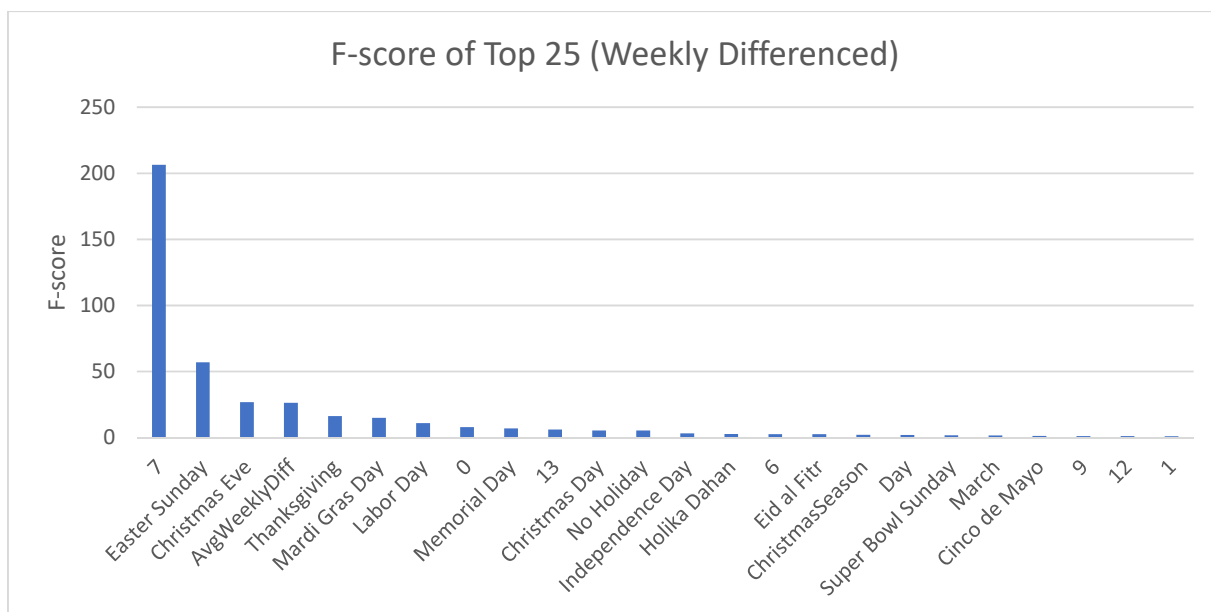

**Supplementary Figure S12:** F-score for Top Features (Weekly Differenced). The top 25 features as ranked by their F-scores. Only the previous week's sales have an F-score above 100. Only one statistical feature remains at the top, and the most relevant features are holidays.

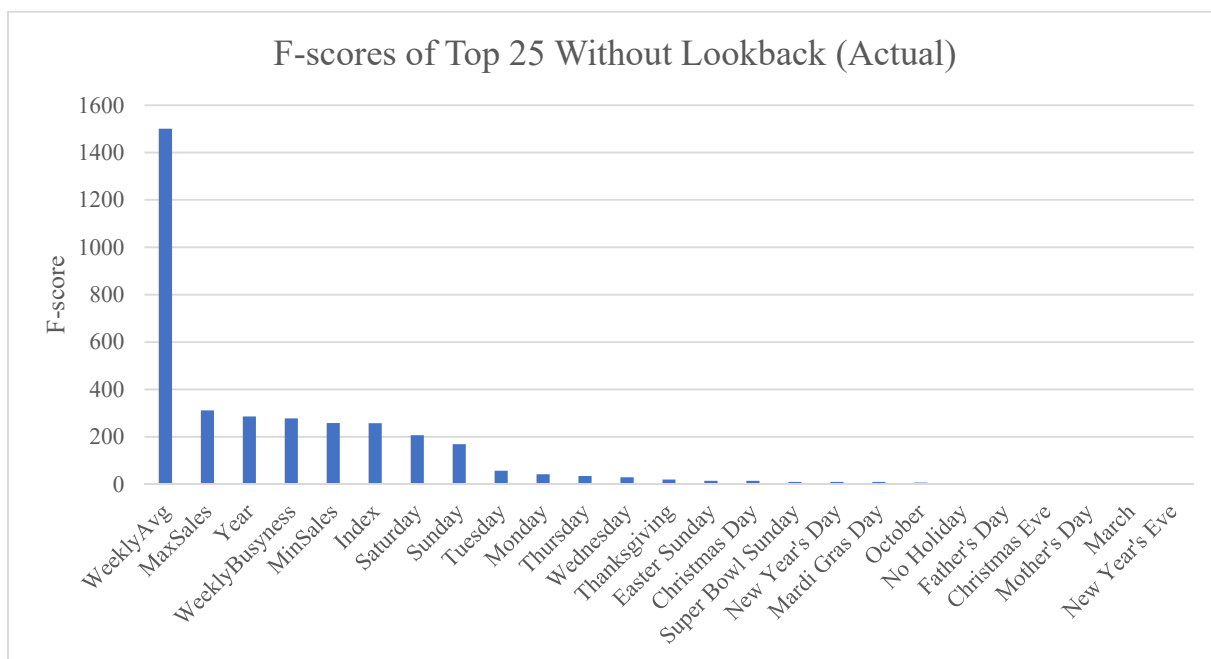

**Supplementary Figure S13:** F-score for Transformer Top Features (Actual). The top 25 features as ranked by their F-scores. With temporal associations built by the model, feature selection can be completed without considering lookback days specifically.

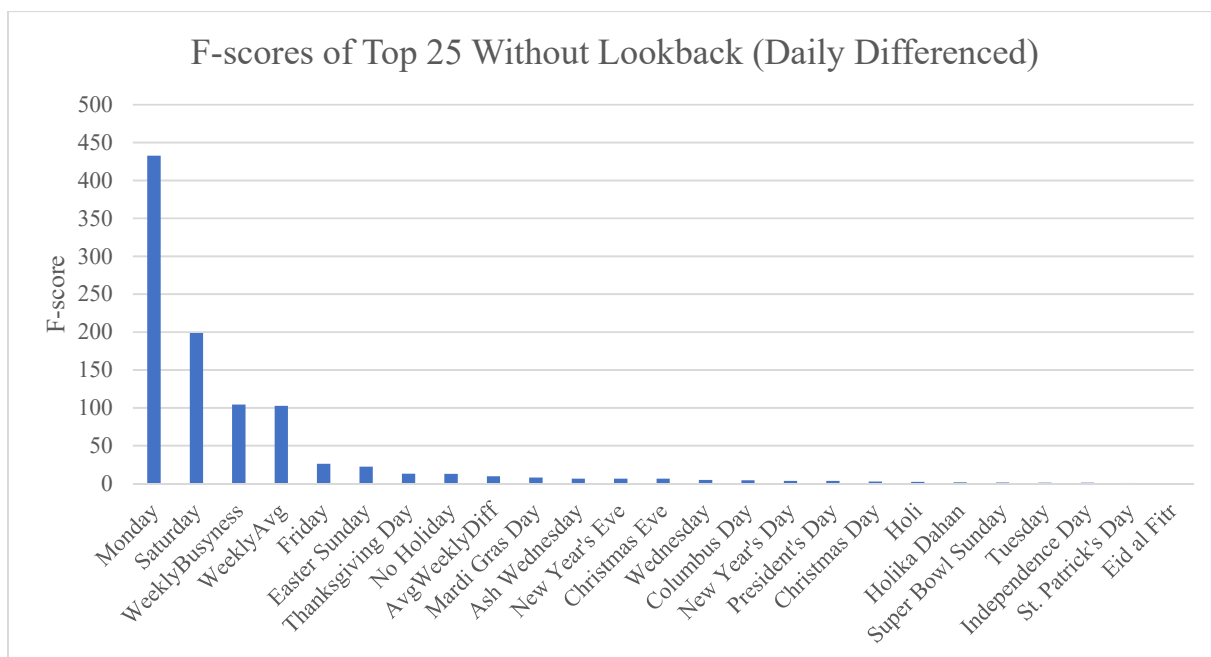

**Supplementary Figure S14:** F-score for Transformer Top Features (Daily Difference). The top 25 features as ranked by their F-scores. With temporal associations built by the model, feature selection can be completed without considering lookback days specifically.

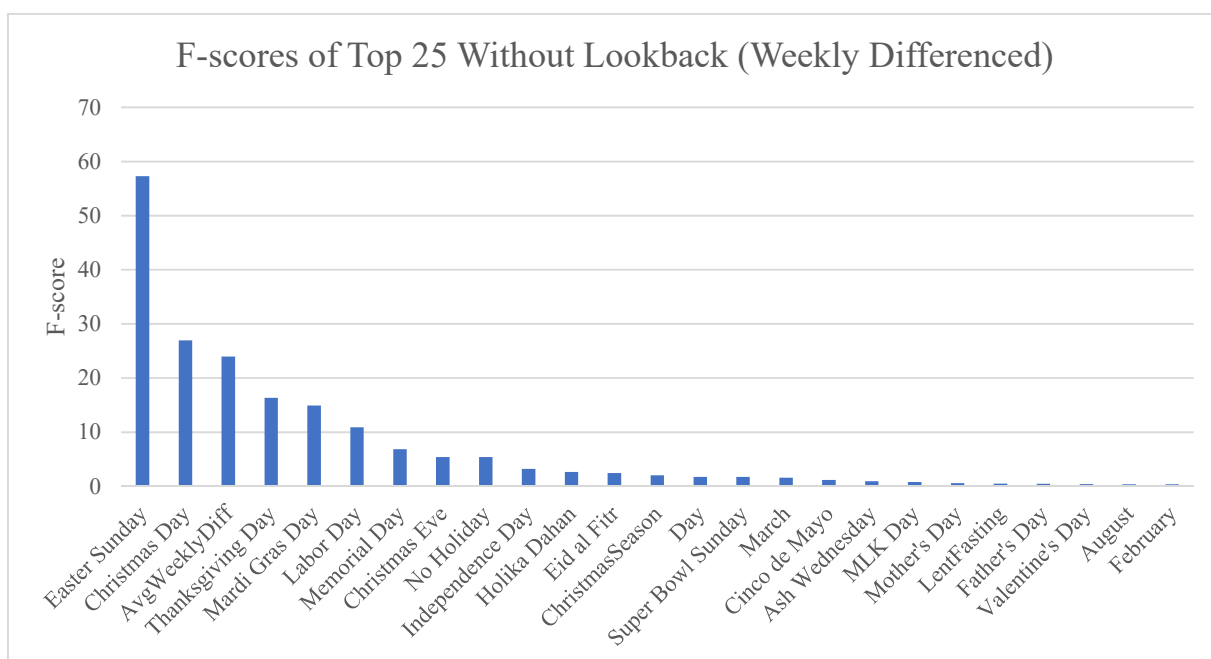

**Supplementary Figure S15:** F-score for Transformer Top Features (Weekly Difference). The top 25 features as ranked by their F-scores. With temporal associations built by the model, feature selection can be completed without considering lookback days specifically.

## 4.1 One-Day Feature Test Results

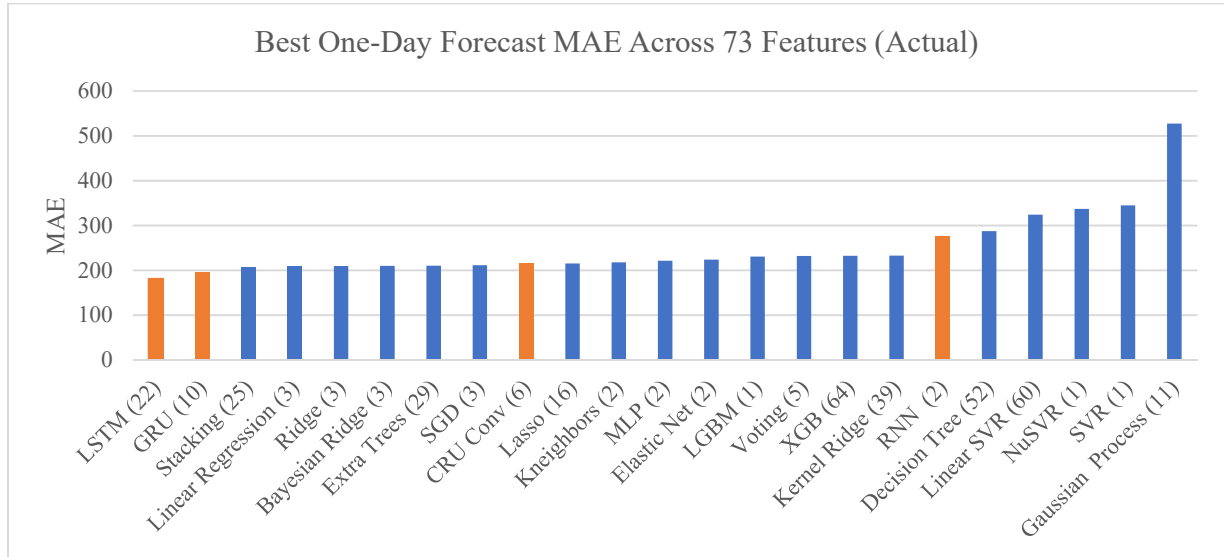

**Supplementary Figure S16:** Best One-Day Forecast MAE Found Across 73 Features (Actual). Recurrent (orange) and non-recurrent (blue) models are trained with an iteratively increasing number of ranked features, seen in Supplementary Figure S10, for one-day forecasting. The lowest MAE for each model is recorded with the number of features next to the model's name.

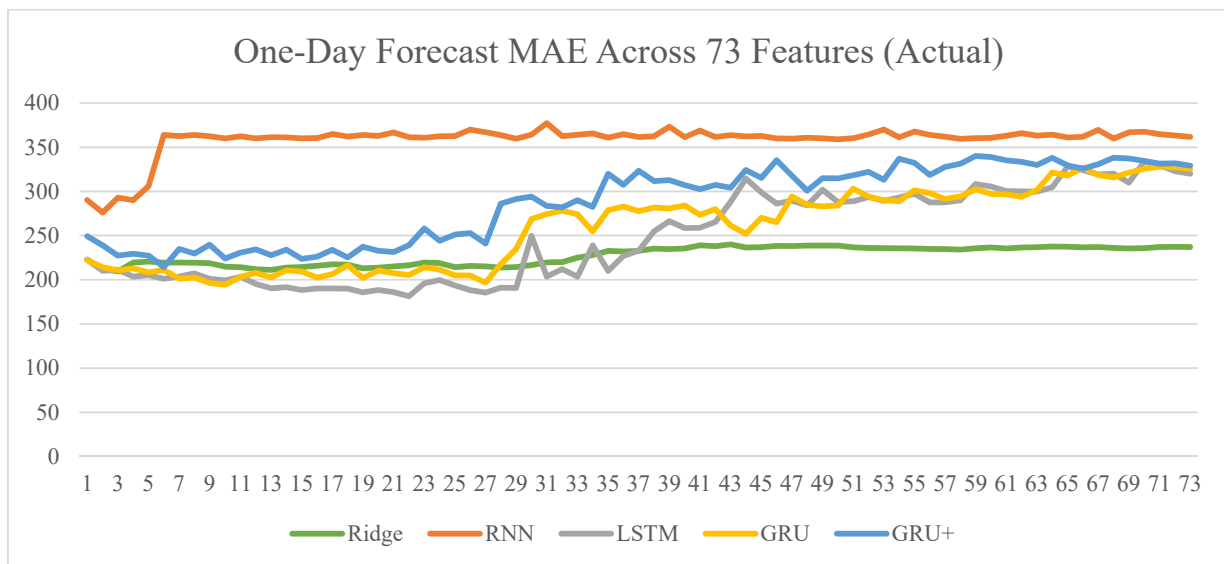

**Supplementary Figure S17:** All RNN Models and Ridge One-Day Forecast MAE Across 73 Features (Actual). We show how the number of features affects the MAE score for one-day forecasting in the actual dataset.

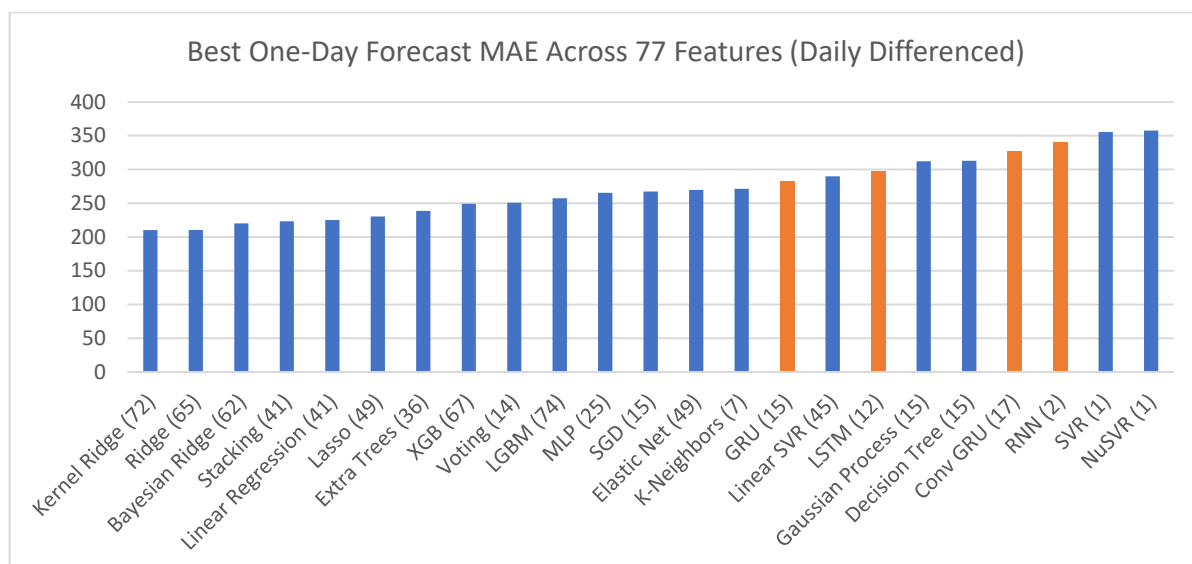

**Supplementary Figure S18:** Best One-Day Forecast MAE Found Across 77 Features (Daily Difference). Recurrent (orange) and non-recurrent (blue) models are trained with an iteratively increasing number of ranked features, seen in Supplementary Figure S11, for one-day forecasting. The lowest MAE for each model is recorded with the number of features next to the model's name.

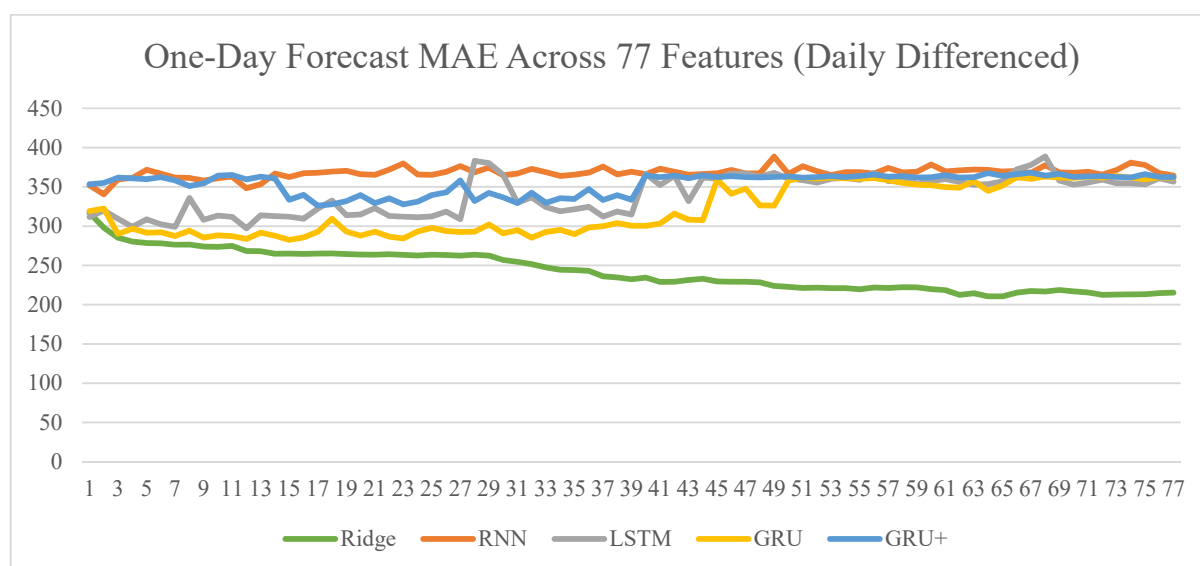

**Supplementary Figure S19:** All RNN Models and Ridge One-Day Forecast MAE Across 77 Features (Daily Difference). We show how the number of features affects the MAE score for one-day forecasting in the daily differenced dataset.

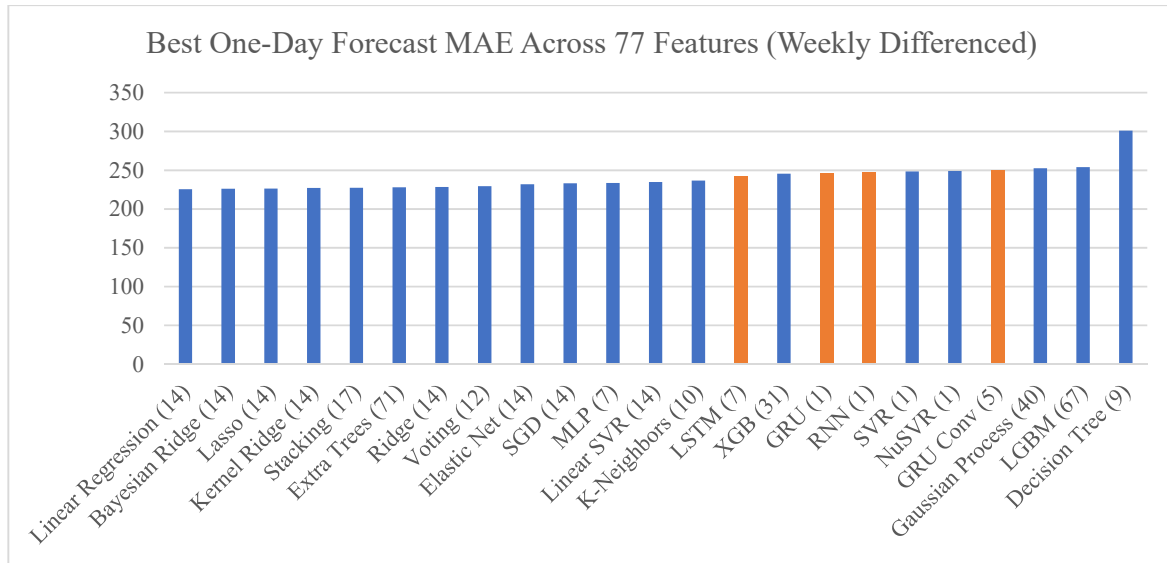

**Supplementary Figure S20:** Best One-Day Forecast MAE Found Across 77 Features (Weekly Difference). Recurrent (orange) and non-recurrent (blue) models are trained with an iteratively increasing number of ranked features, seen in Supplementary Figure S12, for one-day forecasting. The lowest MAE for each model is recorded with the number of features next to the model's name.

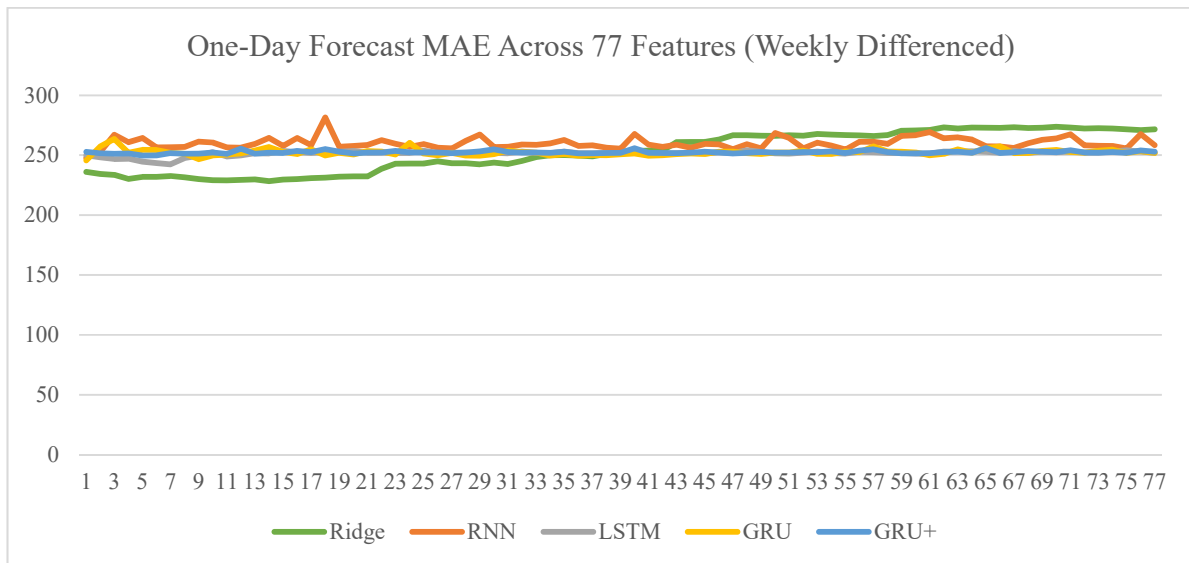

**Supplementary Figure S21:** All RNN Models and Ridge One-Day Forecast MAE Across 77 Features (Weekly Difference). We show how the number of features affects the MAE score for one-day forecasting in the weekly differenced dataset. The weekly differenced dataset shows little improvement as features are added.

## 4.2 One-Week Feature Test Results

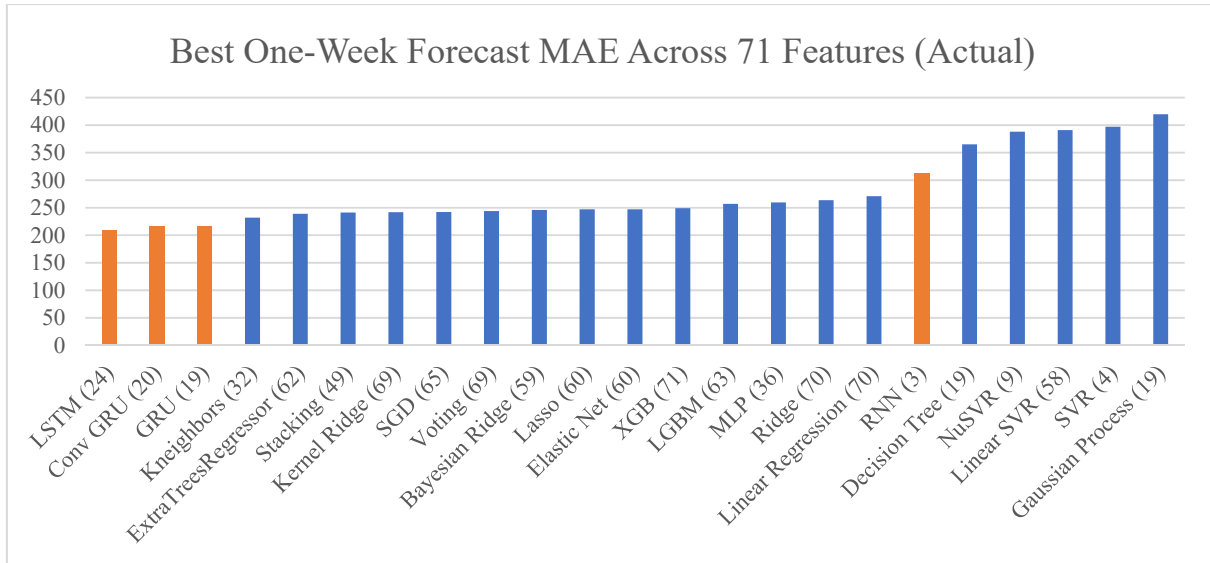

**Supplementary Figure S22:** Best One-Week Forecast MAE Found Across 71 Features (Actual). Recurrent (orange) and non-recurrent (blue) models are trained with an iteratively increasing number of ranked features, seen in Supplementary Figure S10, for one-week forecasting. The lowest MAE for each model is recorded with the number of features next to the model's name. It is promising that most RNN models perform well in this stage, but we are wary of overfitting.

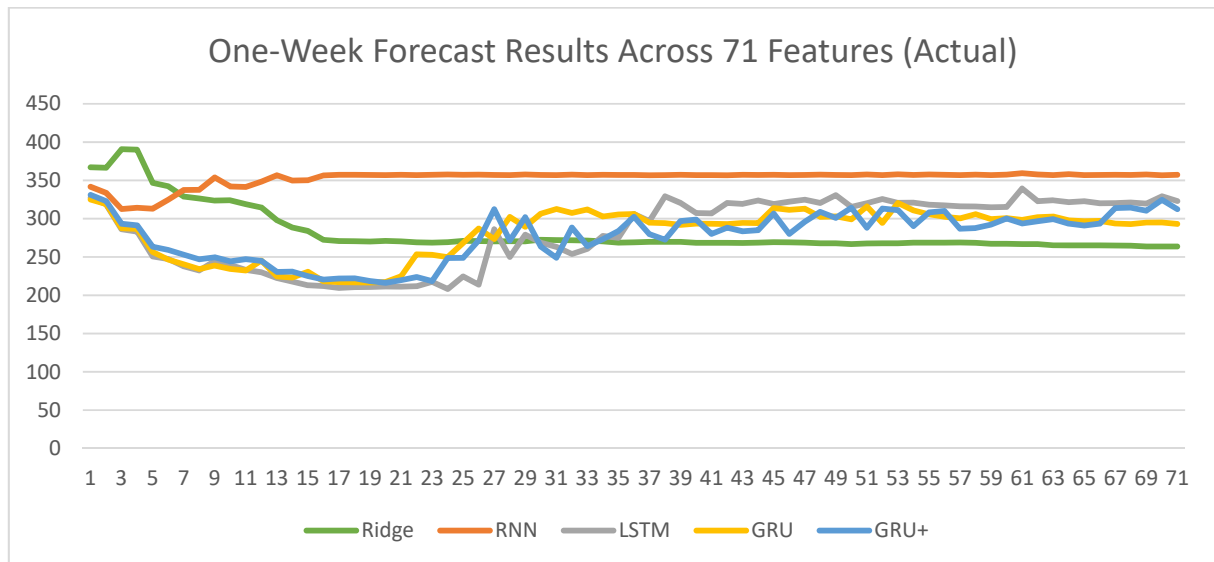

**Supplementary Figure S23:** All RNN Models and Ridge One-Day Forecast MAE Across 71 Features (Actual). We show how the number of features affects the MAE score for one-week forecasting in the actual dataset.

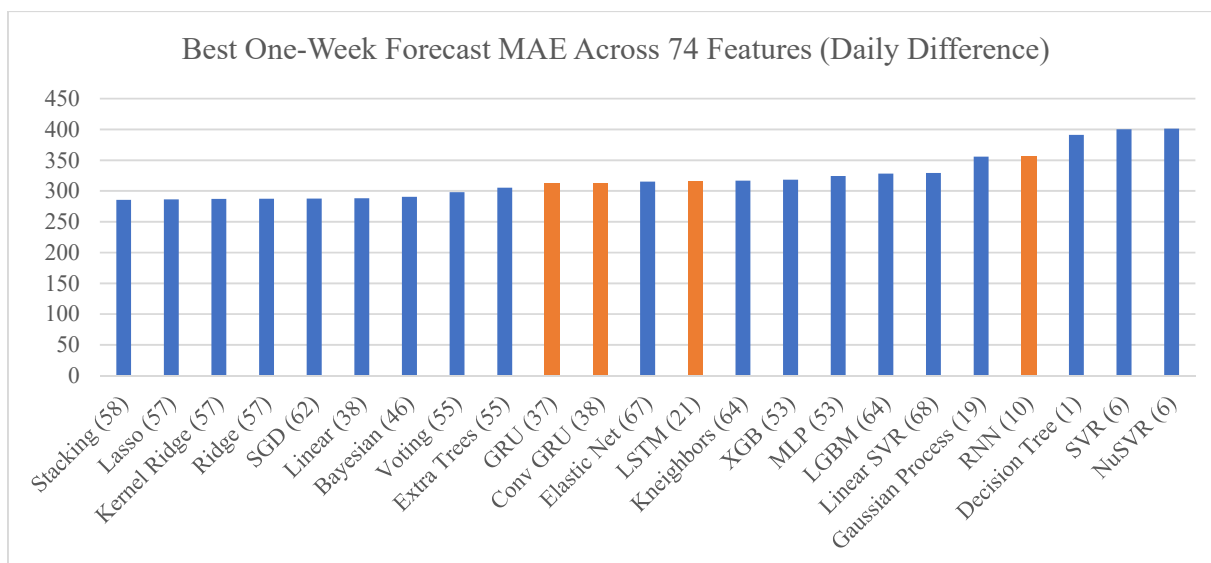

**Supplementary Figure S24:** Best One-Week Forecast MAE Found Across 74 Features (Daily Difference). Recurrent (orange) and non-recurrent (blue) models are trained with an iteratively increasing number of ranked features, seen in Supplementary Figure S11, for one-week forecasting. The lowest MAE for each model is recorded with the number of features next to the model's name.

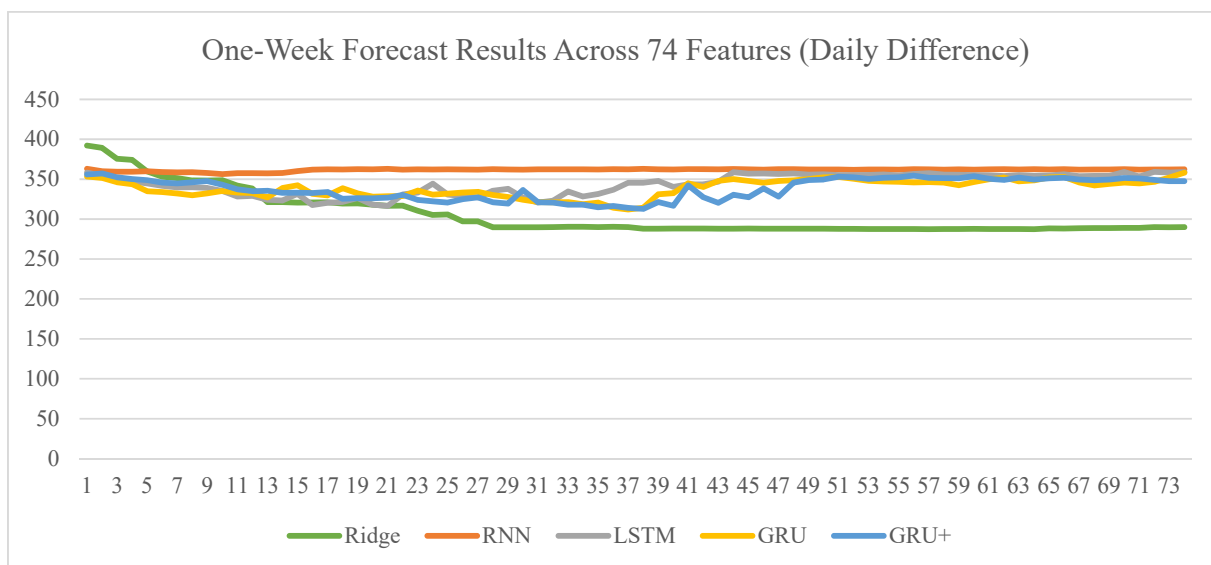

**Supplementary Figure S25** All RNN Models and Ridge One-Week Forecast Across 74 Features (Daily Difference). The ridge example shows how the number of features affects the MAE score for one-week forecasting in the daily differenced dataset.

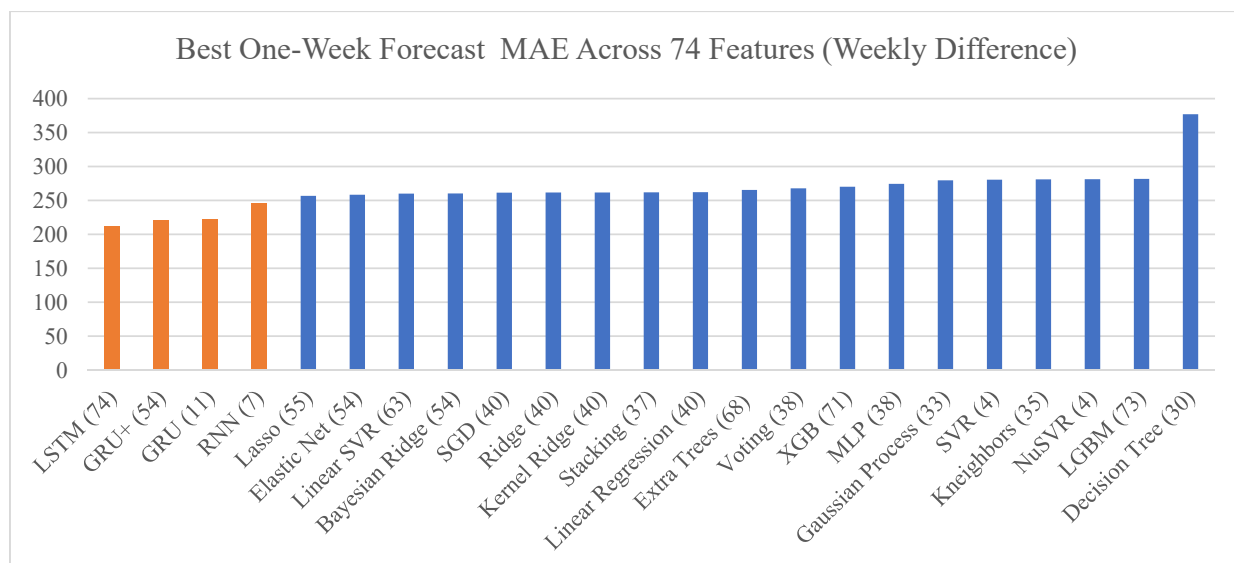

**Supplementary Figure S26:** Best One-Week Forecast MAE Found Across 74 Features (Weekly Difference). Recurrent (orange) and non-recurrent (blue) models are trained with an iteratively increasing number of ranked features, seen in Supplementary Figure S12, for one-week forecasting. The lowest MAE for each model is recorded with the number of features next to the model's name. Good results from RNN models are promising, but need to be verified in a fair final test.

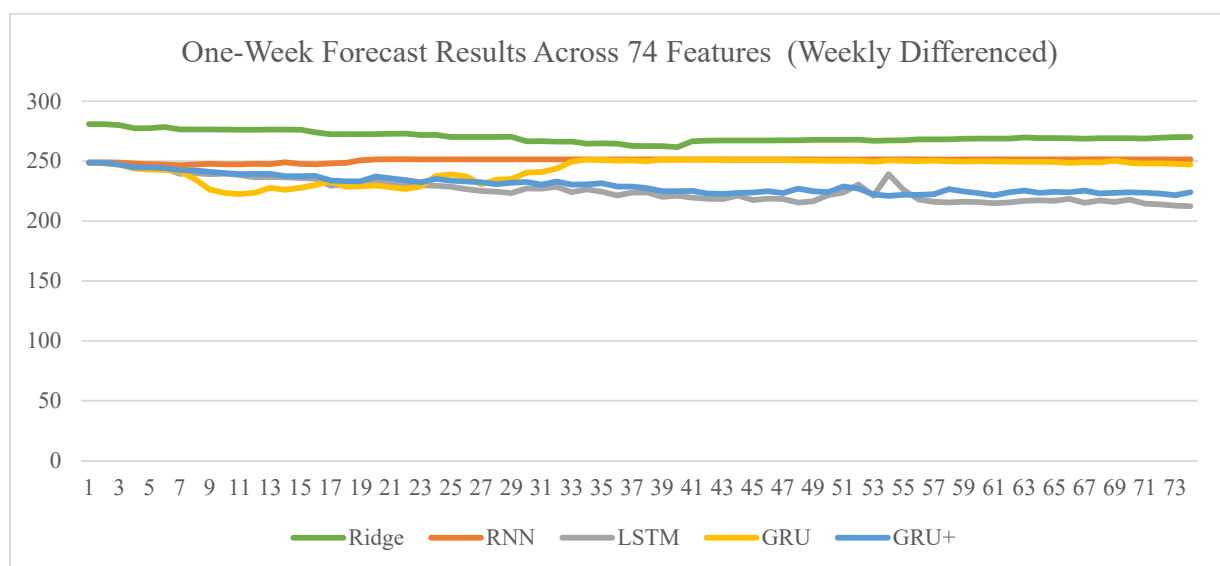

**Supplementary Figure S27:** All RNN Models and Ridge One-Week Forecast Across 74 Features (Weekly Difference). The ridge example shows how the number of features affects the MAE score for one-week forecasting in the weekly differenced dataset.

## 5. Final Test Forecasting Results

### 5.1 One-Day Final Test Results

**Supplementary Table S9:** One-Day Forecast Actual Full Results. The Supplementary Table displays the model, test MAE, sMAPE, gMAPE, and the dataset used to achieve the result. We display the full results of all models from all three datasets. Best results from each dataset and the baseline are bolded. Best results are seen in the Actual and Daily datasets. Many recurrent models have trouble scoring below the baseline.

| Model                         | Type      | MAE            | sMAPE        | gMAE           | Dataset       |
|-------------------------------|-----------|----------------|--------------|----------------|---------------|
| <b>Kernel Ridge</b>           | <b>NR</b> | <b>214.230</b> | <b>0.196</b> | <b>126.258</b> | <b>Daily</b>  |
| Ridge                         | NR        | 216.163        | <b>0.195</b> | 144.829        | Daily         |
| Bayesian Ridge                | NR        | 217.896        | 0.196        | 146.150        | Daily         |
| Linear                        | NR        | 219.587        | 0.198        | 137.914        | Daily         |
| <b>TFT Less Features</b>      | <b>R</b>  | <b>220.085</b> | <b>0.196</b> | <b>133.816</b> | <b>Actual</b> |
| Stacking                      | NR        | 220.186        | 0.195        | 142.360        | Actual        |
| Bayesian Ridge                | NR        | 221.625        | 0.195        | 144.142        | Actual        |
| Ridge                         | NR        | 221.719        | 0.195        | 144.238        | Actual        |
| Linear                        | NR        | 221.808        | 0.195        | 144.203        | Actual        |
| SGD                           | NR        | 221.823        | 0.195        | 144.079        | Actual        |
| LSTM                          | R         | 222.131        | 0.196        | 131.226        | Actual        |
| Lasso                         | NR        | 223.043        | 0.201        | 141.195        | Daily         |
| Stacking                      | NR        | 223.411        | 0.200        | 148.328        | Daily         |
| Lasso                         | NR        | 226.758        | 0.201        | 147.108        | Actual        |
| GRU                           | R         | 227.226        | 0.200        | 144.194        | Actual        |
| Extra Trees                   | NR        | 231.537        | 0.204        | 128.713        | Actual        |
| <b>Voting</b>                 | <b>NR</b> | <b>238.889</b> | <b>0.213</b> | <b>144.844</b> | <b>Weekly</b> |
| <b>Use-Last-Week-Enhanced</b> | <b>NR</b> | <b>239.756</b> | <b>0.215</b> | <b>150.068</b> | <b>Actual</b> |
| XGB                           | NR        | 241.949        | 0.214        | 152.700        | Daily         |
| Stacking                      | NR        | 242.788        | 0.215        | 139.604        | Weekly        |
| TFT All Features              | R         | 244.656        | 0.215        | 159.264        | Actual        |
| Linear                        | NR        | 245.574        | 0.217        | 140.842        | Weekly        |
| Kernel Ridge                  | NR        | 245.686        | 0.219        | 144.613        | Weekly        |

|                      |           |                |              |                |               |
|----------------------|-----------|----------------|--------------|----------------|---------------|
| Bayesian Ridge       | NR        | 245.871        | 0.218        | 142.508        | Weekly        |
| Lasso                | NR        | 246.007        | 0.218        | 141.718        | Weekly        |
| Ridge                | NR        | 246.901        | 0.218        | 144.810        | Weekly        |
| K-Neighbors          | NR        | 248.726        | 0.215        | 149.253        | Actual        |
| Extra Trees          | NR        | 253.214        | 0.224        | 171.946        | Daily         |
| GRU+                 | R         | 255.160        | 0.232        | 144.749        | Weekly        |
| Extra Trees          | NR        | 256.181        | 0.229        | 166.908        | Weekly        |
| GRU                  | R         | 259.470        | 0.237        | 153.419        | Weekly        |
| RNN                  | R         | 262.974        | 0.237        | 159.277        | Weekly        |
| LSTM                 | R         | 263.990        | 0.238        | 159.088        | Weekly        |
| TFT All Features     | R         | 267.929        | 0.225        | 169.346        | Daily         |
| TFT Less Features    | R         | 270.420        | 0.231        | 176.263        | Daily         |
| TFT Less Features    | R         | 272.283        | 0.249        | 162.680        | Weekly        |
| GRU                  | R         | 272.639        | 0.237        | 176.367        | Daily         |
| <b>Use-Last-Week</b> | <b>R</b>  | <b>278.491</b> | <b>0.256</b> | <b>165.358</b> | <b>Actual</b> |
| GRU+                 | R         | 289.512        | 0.240        | 195.203        | Actual        |
| LSTM                 | R         | 294.707        | 0.247        | 185.289        | Daily         |
| GRU+                 | R         | 325.965        | 0.275        | 213.258        | Daily         |
| RNN                  | R         | 370.611        | 0.315        | 223.414        | Daily         |
| <b>Use-Yesterday</b> | <b>NR</b> | <b>392.659</b> | <b>1.205</b> | <b>228.724</b> | <b>Daily</b>  |
| TFT All Features     | R         | 456.367        | 0.355        | <b>320.791</b> | Weekly        |
| RNN                  | R         | <b>481.217</b> | 0.426        | 271.143        | Actual        |

### 5.1.1 Non-Recurrent Algorithm Forecast Figures

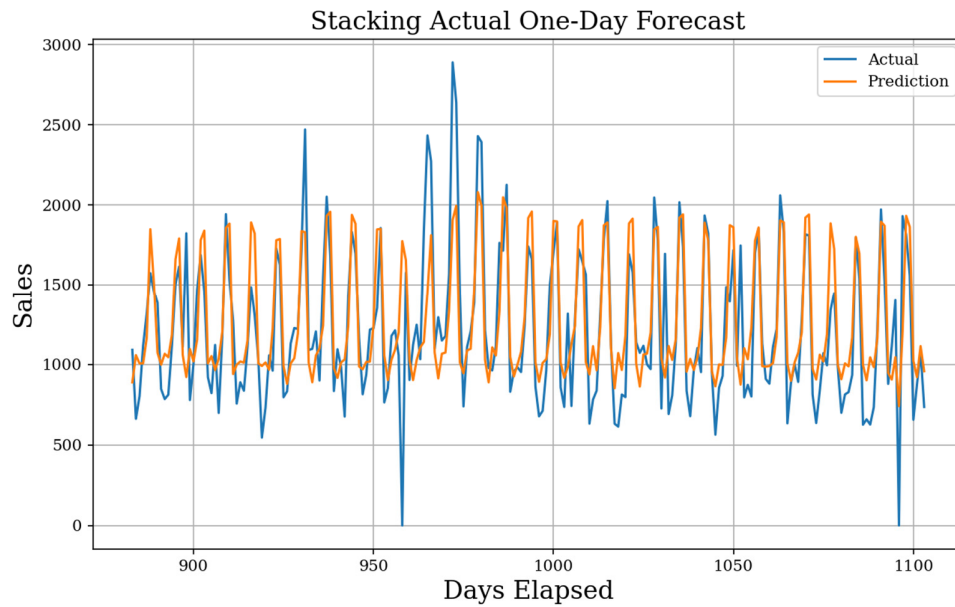

**Supplementary Figure S28:** Stacking Actual One-Day Forecast. MAE of 220, sMAPE of 19.5%, and a gMAE of 142, with 25 features

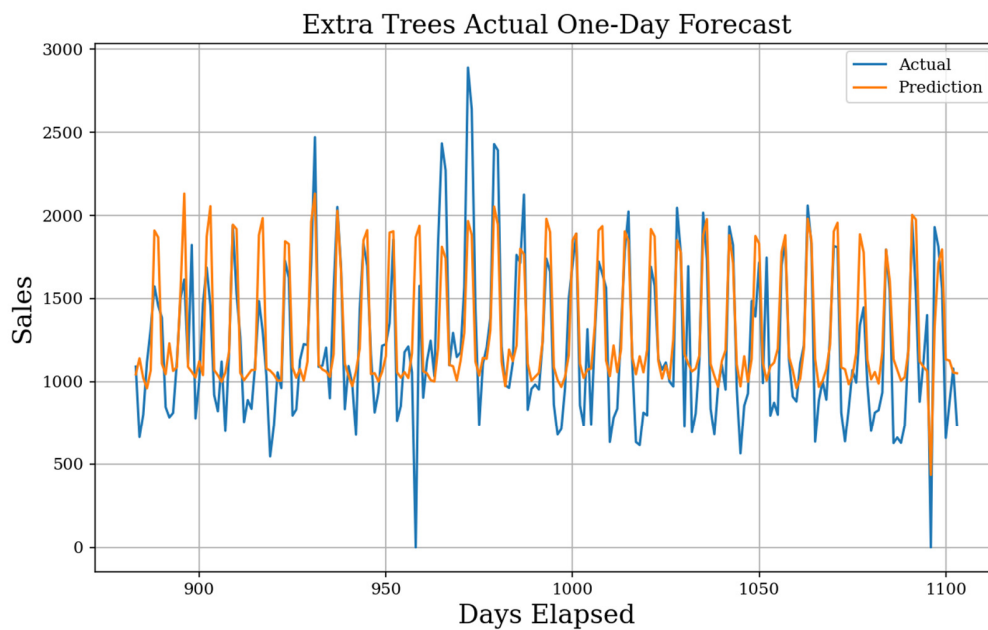

**Supplementary Figure S29:** Extra Trees Actual One-Day Forecast. MAE of 231, sMAPE of 20.4%, and a gMAE of 128, with 29 features.

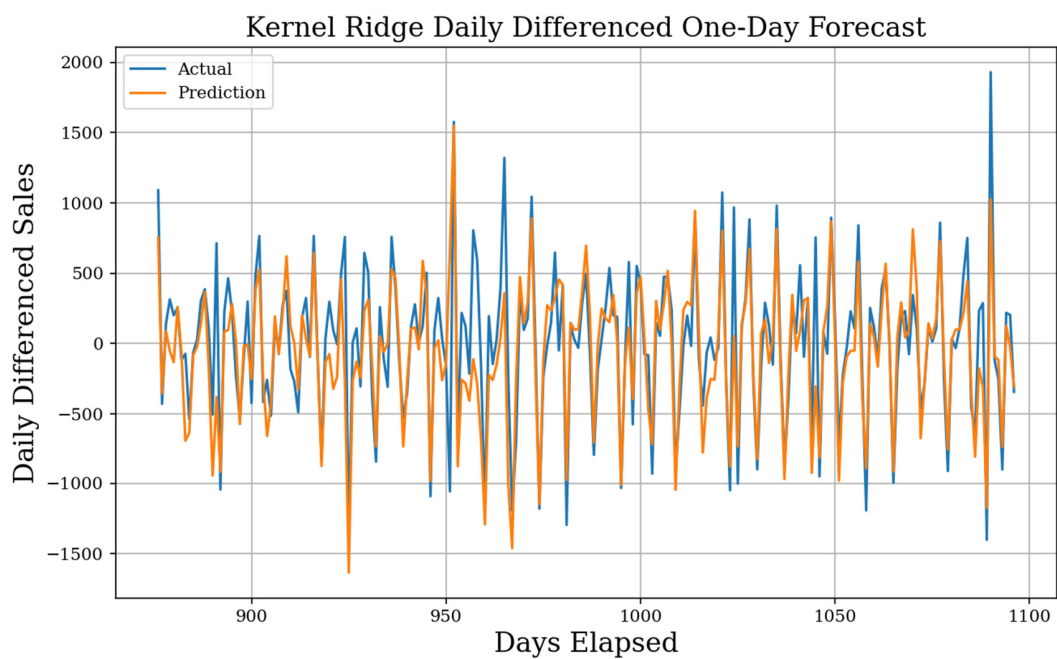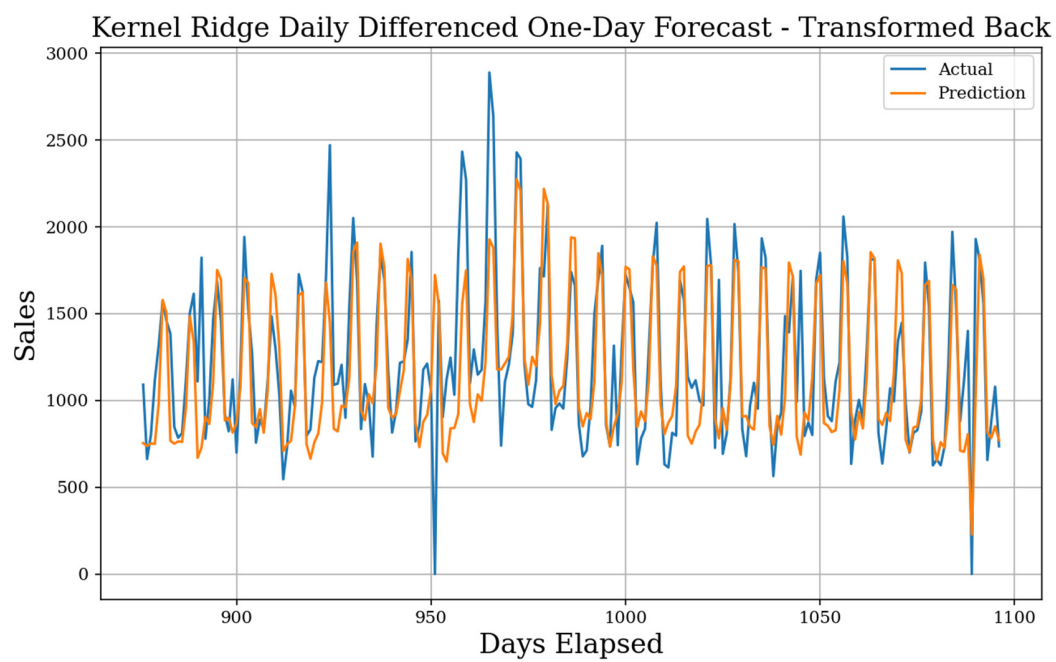

**Supplementary Figure S30:** Kernel Ridge Daily Differenced One-Day Forecast. MAE of 214, sMAPE of 19.6%, and a gMAE of 126, with 72 features. Original predictions (first) and then transformed back version (second) are both shown.

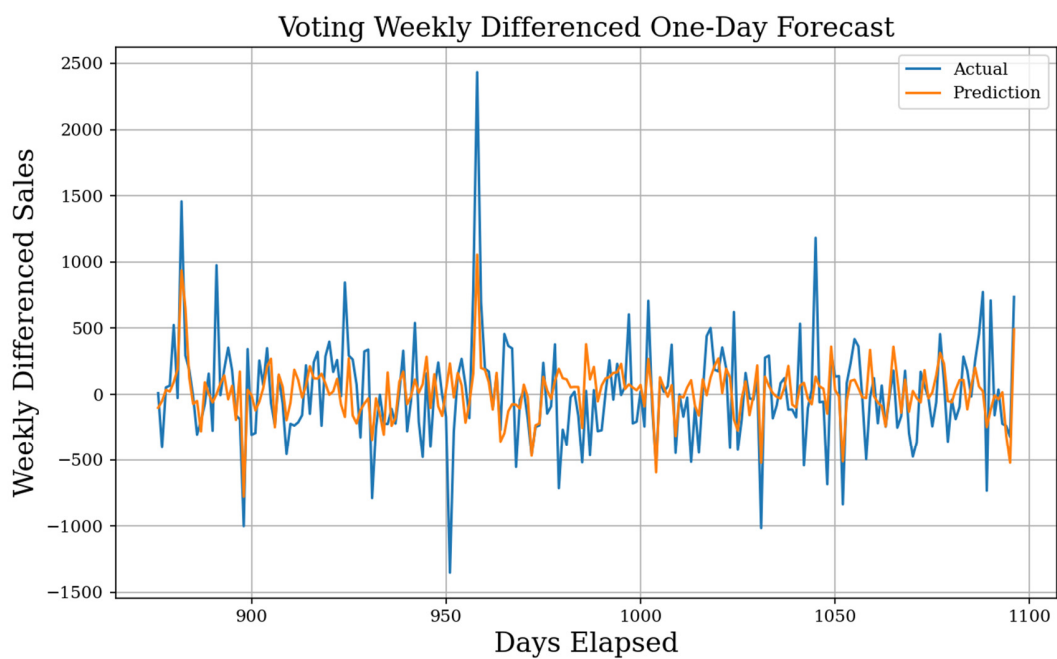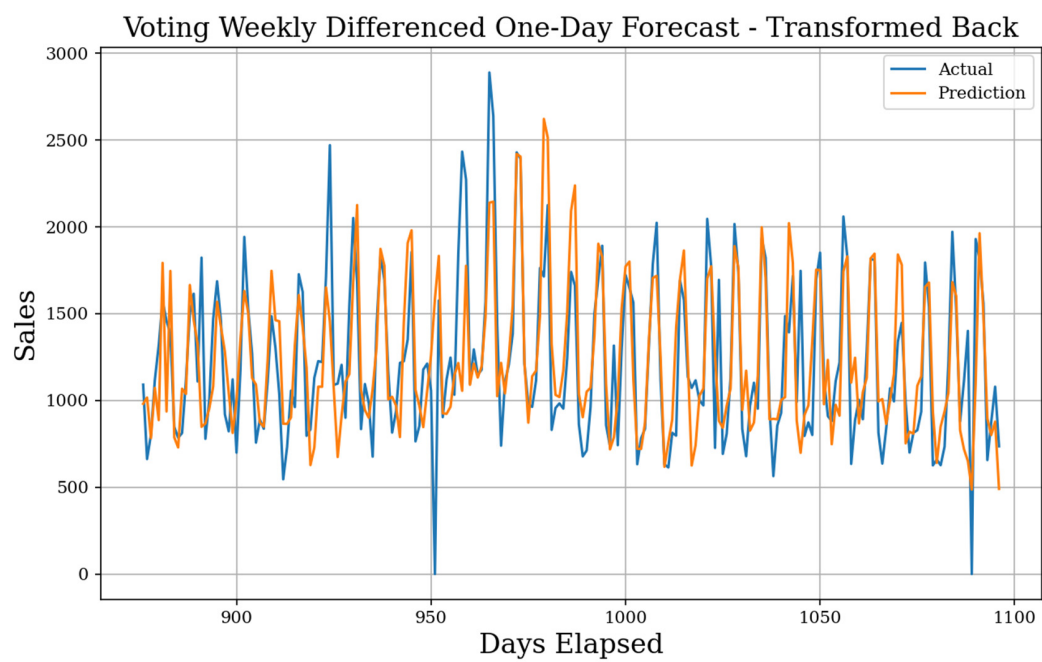

**Supplementary Figure S31:** Voting Weekly Differenced One-Day Forecast. MAE of 238, sMAPE of 21.3%, and a gMAE of 144, with 12 features.

### 5.1.2 Recurrent Algorithms Forecast Figures

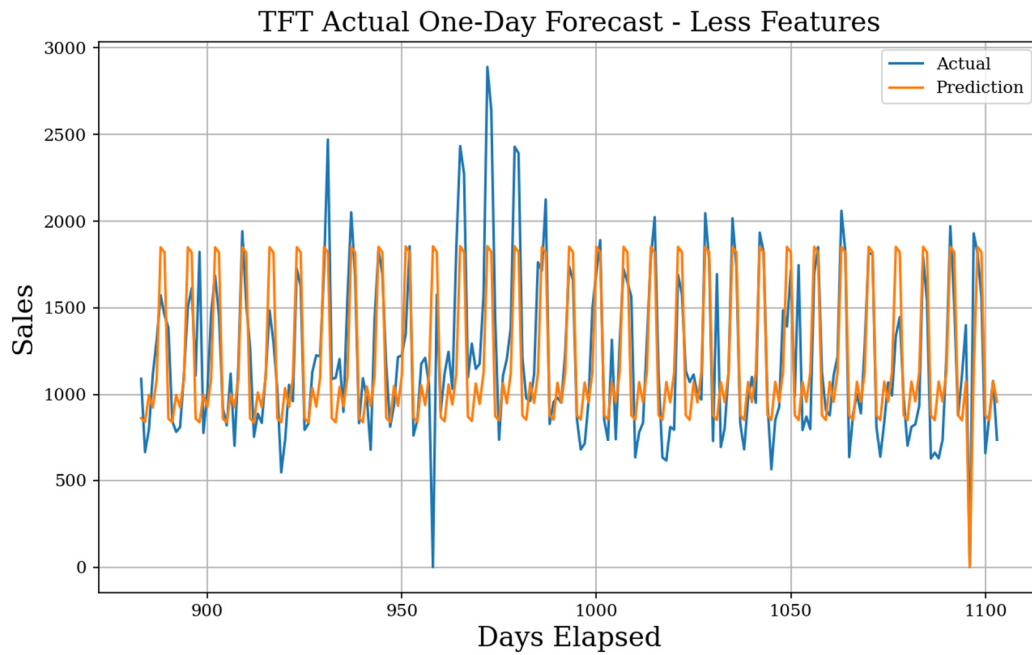

**Supplementary Figure S32:** Transformer Less Features Actual One-Day Forecast. MAE of 220, sMAPE of 19.6%, and a gMAE of 133, with 17 features.

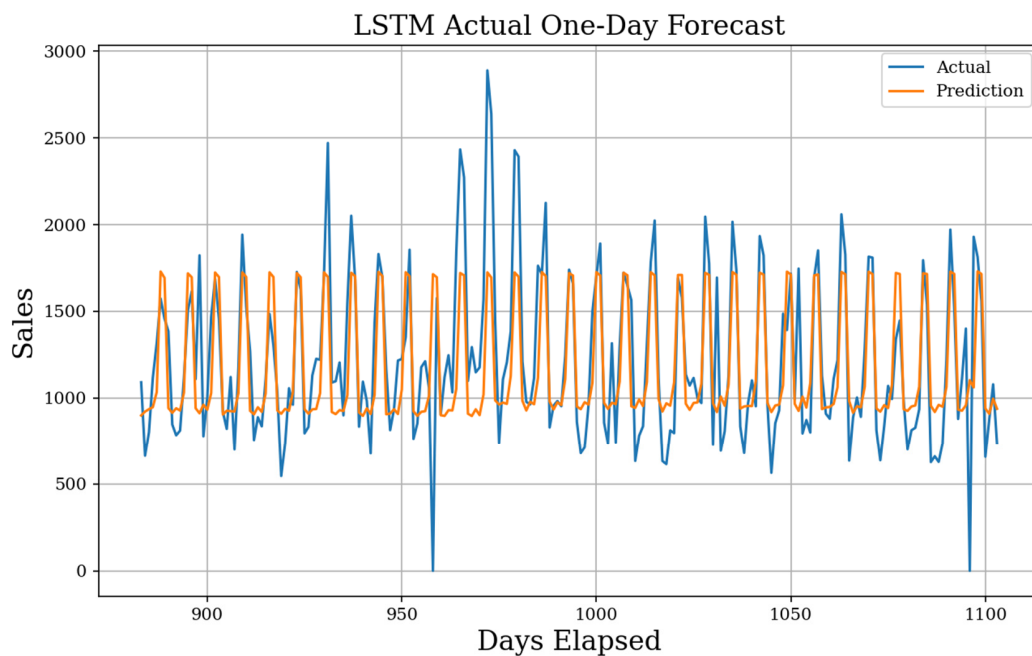

**Supplementary Figure S33:** LSTM Actual One-Day Forecast. MAE of 222, sMAPE of 19.6%, and a gMAE of 131, with 22 features.

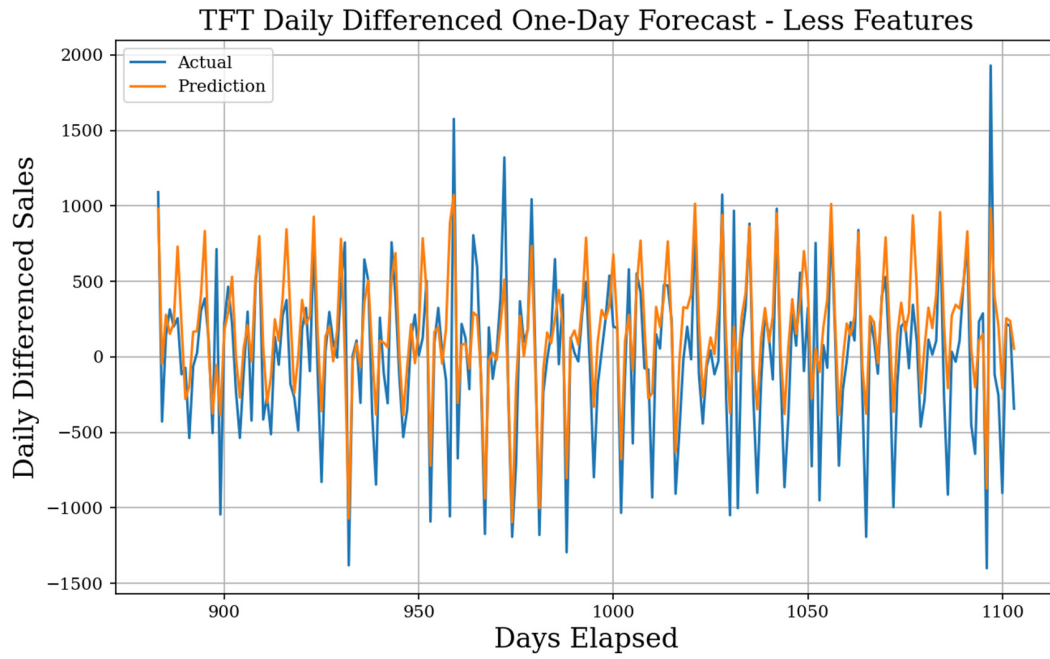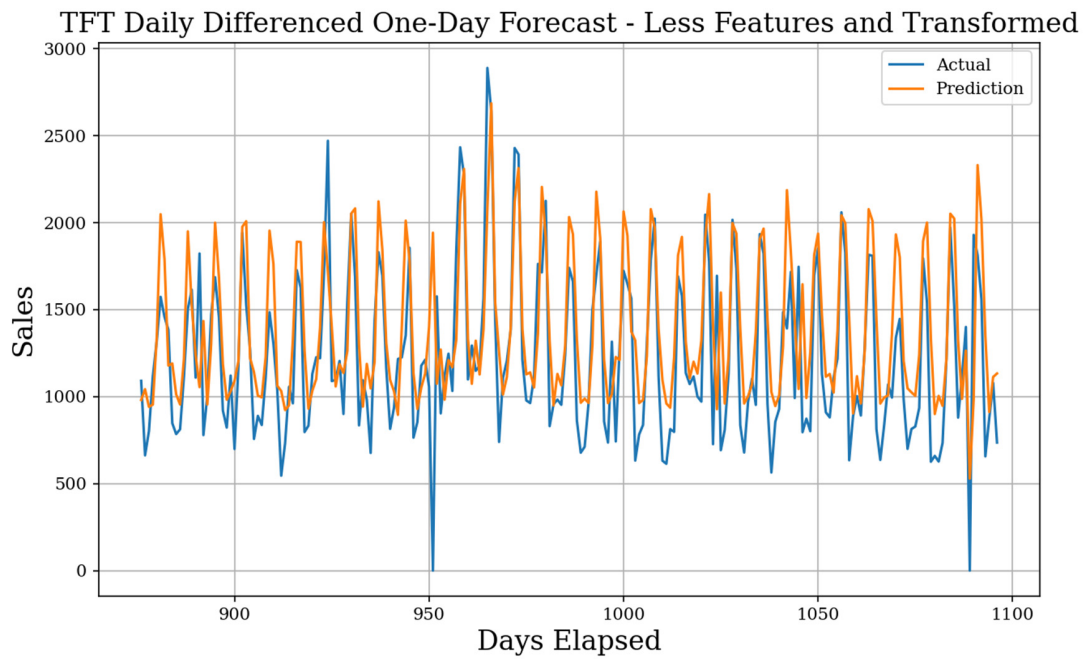

**Supplementary Figure S34:** Transformer Less Features Daily Differenced One-Day Forecast. MAE of 270, sMAPE of 23.1%, and a gMAE of 176, with 13 features.

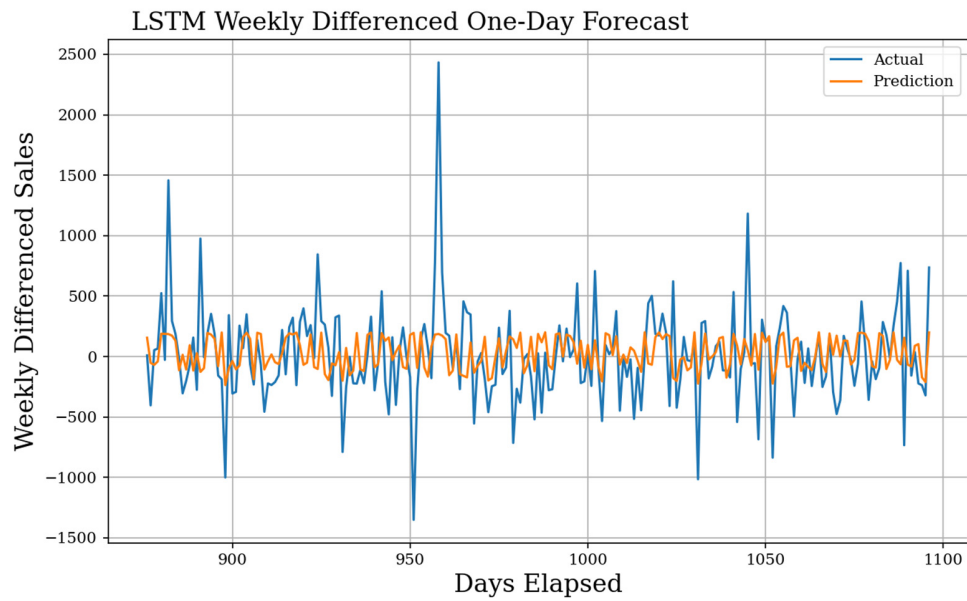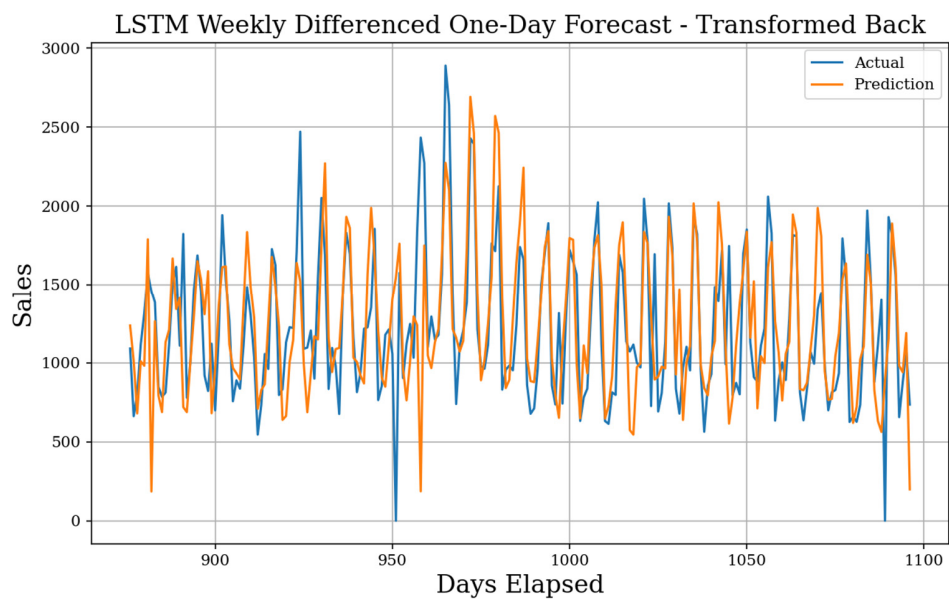

**Supplementary Figure S35:** LSTM Weekly Differenced One-Day Forecast. MAE of 263, sMAPE of 23.8%, and a gMAE of 159, with seven features.

## 5.2 One-Week Feature Test Results

**Supplementary Table S10:** One-Week Forecast Actual Full Results. The Supplementary Table displays the model, test MAE, sMAPE, gMAPE, and the dataset used to achieve the result. One-week specific metrics like best start day, the mean of each weekday start, and the standard deviation between each start are also included. Best results, by MAE, for each dataset and the baseline are bolded. RNN models with the Actual dataset are the only results to beat the baseline Use-Last-Week-Enhanced. Different methodologies for extending non-RNN models to longer horizon windows are required.

| Model                         | Type      | MAE            | sMAPE        | gMAE           | Dataset       | Weekday        | Mean           | Std Dev      |
|-------------------------------|-----------|----------------|--------------|----------------|---------------|----------------|----------------|--------------|
| <b>TFT Less Features</b>      | <b>R</b>  | <b>215.309</b> | <b>0.202</b> | <b>123.842</b> | <b>Actual</b> | <b>Friday</b>  | <b>222.657</b> | <b>3.363</b> |
| GRU                           | R         | 218.806        | <b>0.195</b> | <b>116.842</b> | Actual        | Sunday         | 233.224        | 13.477       |
| LSTM                          | R         | 222.183        | 0.197        | 134.022        | Actual        | Thursday       | 228.797        | 5.339        |
| <b>Use-Last-Week-Enhanced</b> | <b>NR</b> | <b>230.865</b> | <b>0.203</b> | <b>139.891</b> | <b>Actual</b> | <b>Tuesday</b> | <b>232.964</b> | <b>2.437</b> |
| GRU+                          | R         | 233.485        | 0.204        | 136.278        | Actual        | Wednesday      | 246.925        | 14.612       |
| Extra Trees                   | NR        | 235.671        | 0.206        | 145.267        | Actual        | Wednesday      | 240.753        | 4.085        |
| Stacking                      | NR        | 237.524        | 0.208        | 146.056        | Actual        | Tuesday        | 243.917        | 4.634        |
| Voting                        | NR        | 237.673        | 0.209        | 140.365        | Actual        | Friday         | 246.417        | 8.256        |
| Kernel Ridge                  | NR        | 239.376        | 0.213        | 143.088        | Actual        | Wednesday      | 244.985        | 4.229        |
| SGD                           | NR        | 240.525        | 0.214        | 140.116        | Actual        | Tuesday        | 249.395        | 7.712        |
| Bayesian Ridge                | NR        | 242.961        | 0.216        | 145.162        | Actual        | Wednesday      | 248.505        | 3.408        |
| Lasso                         | NR        | 243.377        | 0.218        | 147.151        | Actual        | Thursday       | 248.388        | 2.979        |
| <b>Lasso</b>                  | <b>NR</b> | <b>253.214</b> | <b>1.284</b> | <b>137.134</b> | <b>Weekly</b> | <b>Sunday</b>  | <b>256.633</b> | <b>3.156</b> |
| Ridge                         | NR        | 256.788        | 1.274        | 144.496        | Weekly        | Sunday         | 261.872        | 3.403        |
| Kernel Ridge                  | NR        | 257.239        | 1.274        | 146.107        | Weekly        | Sunday         | 262.033        | 3.436        |
| Elastic Net                   | NR        | 257.627        | 1.327        | 153.369        | Weekly        | Sunday         | 259.266        | 1.495        |
| SGD                           | NR        | 257.779        | 1.280        | 148.201        | Weekly        | Monday         | 261.827        | 2.978        |

|                   |           |                |              |                |              |               |                |              |
|-------------------|-----------|----------------|--------------|----------------|--------------|---------------|----------------|--------------|
| LinSVR            | NR        | 258.030        | 1.405        | 149.518        | Weekly       | Sunday        | 260.927        | 1.939        |
| Bayesian Ridge    | NR        | 259.125        | 1.304        | 151.530        | Weekly       | Sunday        | 260.490        | 1.210        |
| Stacking          | NR        | 260.480        | 1.281        | 151.251        | Weekly       | Monday        | 264.051        | 2.694        |
| TFT Less Features | R         | 263.407        | 1.371        | 147.057        | Weekly       | Tuesday       | 278.024        | 9.849        |
| TFT All Features  | R         | 267.178        | 0.239        | 153.347        | Actual       | Wednesday     | 268.460        | 1.131        |
| RNN               | R         | 273.599        | 1.722        | 162.270        | Weekly       | Sunday        | 278.034        | 2.950        |
| GRU               | R         | 273.650        | 1.674        | 154.359        | Weekly       | Sunday        | 279.818        | 4.318        |
| <b>Lasso</b>      | <b>NR</b> | <b>280.306</b> | <b>1.016</b> | <b>162.255</b> | <b>Daily</b> | <b>Sunday</b> | <b>287.353</b> | <b>6.530</b> |
| LSTM              | R         | 280.849        | 1.876        | 166.470        | Weekly       | Sunday        | 283.464        | 2.274        |
| GRU+              | R         | 280.853        | <b>1.917</b> | 165.276        | Weekly       | Sunday        | 283.244        | 2.129        |
| Stack             | NR        | 282.991        | 1.022        | 168.323        | Daily        | Sunday        | 289.068        | 4.932        |
| Ridge             | NR        | 283.704        | 1.007        | 166.965        | Daily        | Wednesday     | 289.434        | 6.562        |
| Kernel Ridge      | NR        | 283.880        | 1.009        | 165.939        | Daily        | Wednesday     | 289.372        | 6.364        |
| Linear            | NR        | 284.196        | 1.016        | 165.769        | Daily        | Wednesday     | 290.070        | 6.083        |
| TFT Less Features | R         | 285.203        | 1.081        | 179.880        | Daily        | Monday        | 294.081        | 7.208        |
| SGD               | NR        | 286.235        | 1.046        | 162.893        | Daily        | Saturday      | 291.113        | 4.538        |
| Voting            | NR        | 287.070        | 1.029        | 164.446        | Daily        | Wednesday     | 299.976        | 8.864        |
| Bayesian Ridge    | NR        | 287.731        | 1.028        | 168.909        | Daily        | Sunday        | 292.999        | 5.247        |
| LSTM              | R         | 292.751        | 1.175        | 173.468        | Daily        | Sunday        | 310.536        | 15.681       |
| TFT All Features  | R         | 330.009        | 1.076        | 197.982        | Daily        | Wednesday     | 334.242        | 4.535        |
| RN                | R         | 361.654        | 1.570        | 223.516        | Daily        | Thursday      | 400.535        | 18.508       |
| RNN               | R         | 371.586        | 0.315        | 235.160        | Actual       | Saturday      | 380.430        | 6.642        |
| GRU               | R         | 405.286        | 1.719        | 232.294        | Daily        | Sunday        | 408.500        | 2.928        |
| GRU+              | R         | 406.992        | 1.725        | 240.084        | Daily        | Monday        | 408.595        | 1.202        |
| TFT All Features  | R         | <b>452.629</b> | 1.403        | <b>302.849</b> | Weekly       | Wednesday     | 473.895        | 13.427       |

### 5.2.1 Non-Recurrent Algorithm Forecast Figures

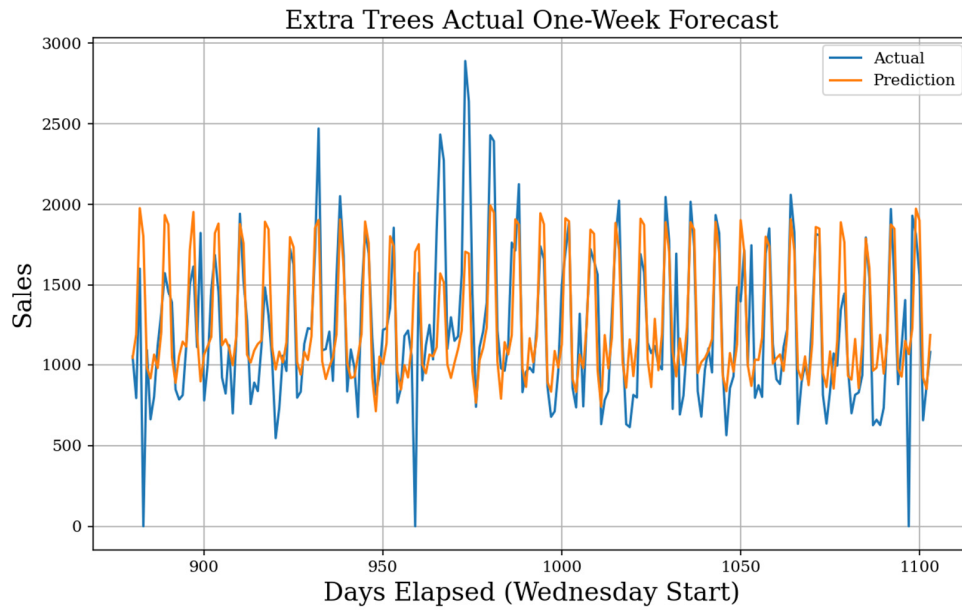

**Supplementary Figure S36:** Extra Trees Actual One-Week Forecast. The best start day MAE of 235, sMAPE of 20.6%, and gMAE of 145 are found when starting predictions on Wednesday. A mean MAE of 240 and a standard deviation of 4.085 are found with 69 features.

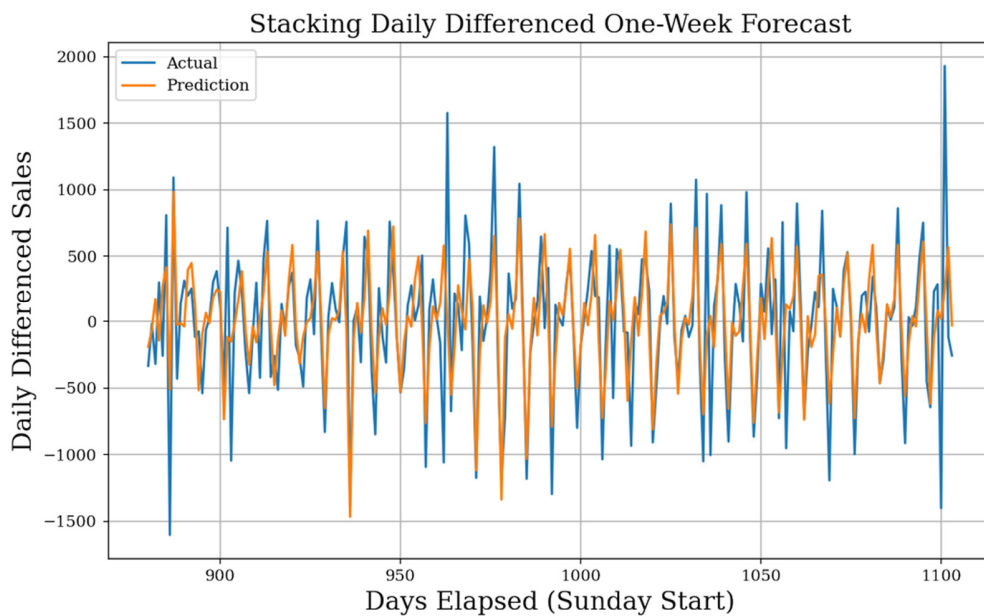

**Supplementary Figure S37:** Stacked Daily Differenced One-Week Forecast. The best start day MAE of 282, sMAPE of 100.02%, and gMAE of 168 are found when starting predictions on Sunday. A mean MAE of 289 and a standard deviation of 4.93 are found with 58 features.

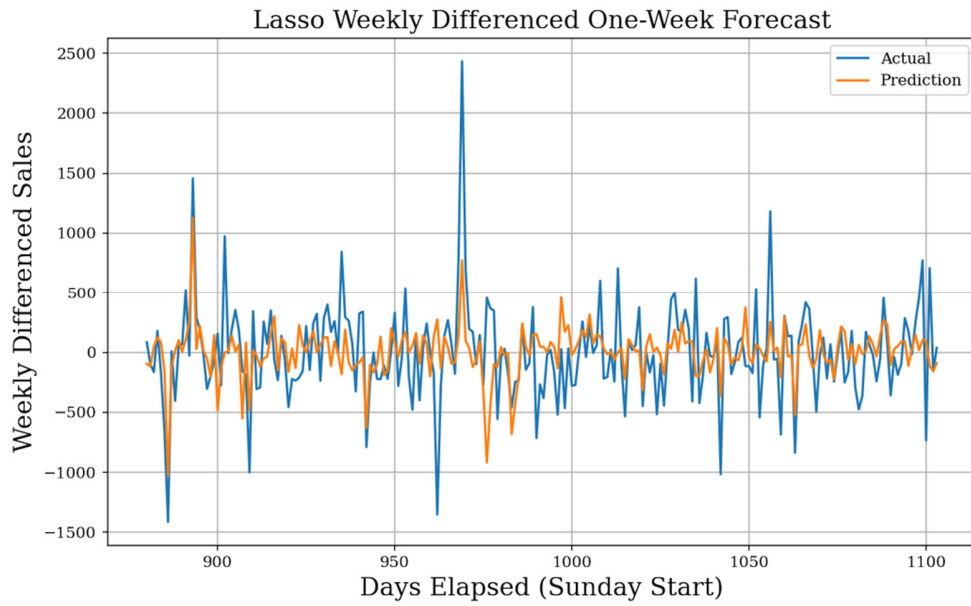

**Supplementary Figure S38:** Lasso Weekly Differenced One-Week Forecast. The best start day MAE of 253, sMAPE of 128.4%, and gMAE of 137 are found when starting predictions on Sunday. A mean MAE of 256 and a standard deviation of 3.15 are found with 55 features.

### 5.2.2 Recurrent Algorithm Forecast Figures

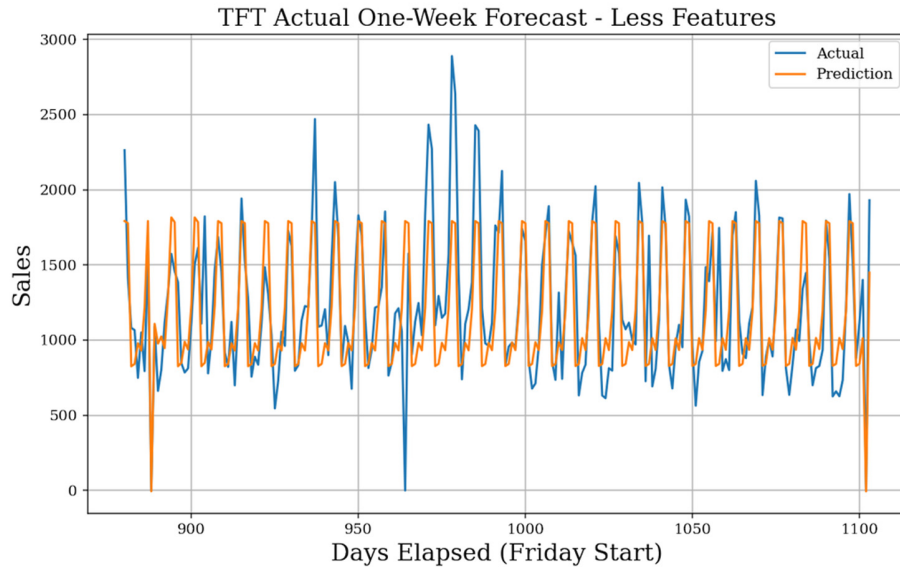

**Supplementary Figure S39:** Transformer Less Features Actual One-Week Forecast. The best start day MAE of 215, sMAPE of 20.2%, and gMAE of 123 are found when starting on Friday. A mean MAE of 222 and a standard deviation of 3.36 are found with 17 features.

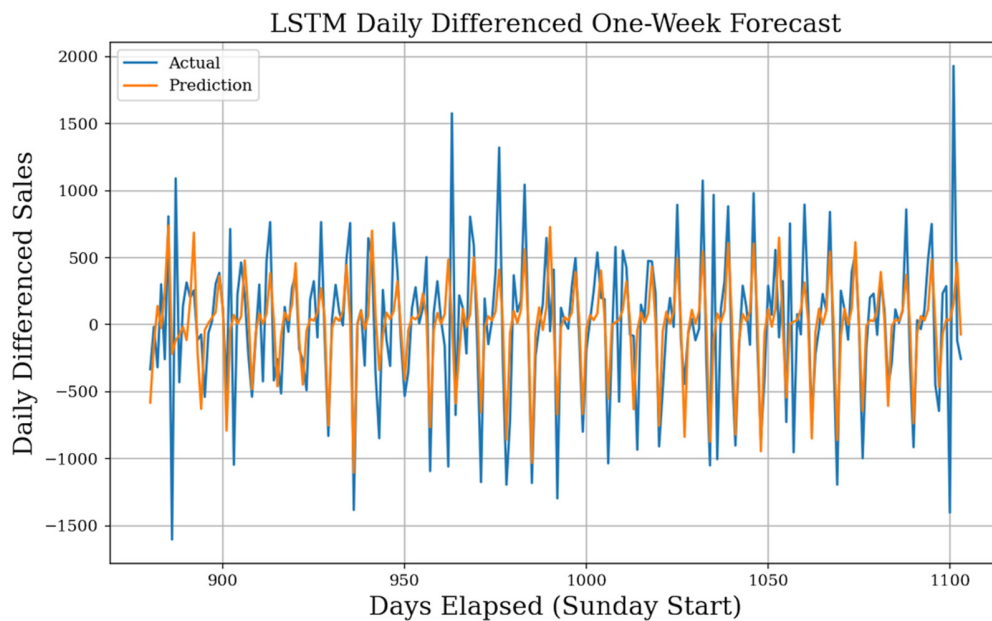

**Supplementary Figure S40:** LSTM Daily Differenced One-Week Forecast. The best start day MAE of 292, sMAPE of 117.5%, and gMAE of 173 are found when starting predictions on Sunday. A mean MAE of 310 and a standard deviation of 15.68 are found with 21 features.

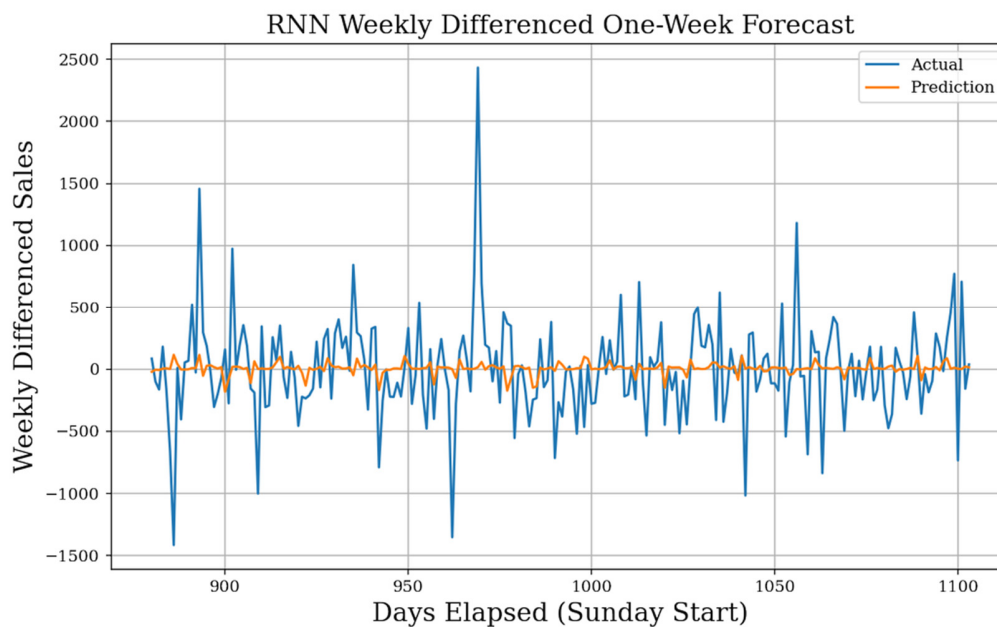

**Supplementary FigureS41:** RNN Weekly Differenced One-Week Forecast. The best start day MAE of 273, sMAPE of 172.2%, and gMAE of 162, are found when starting predictions on Sunday. A mean MAE of 278 and a standard deviation of 2.95 are found with 7 features.

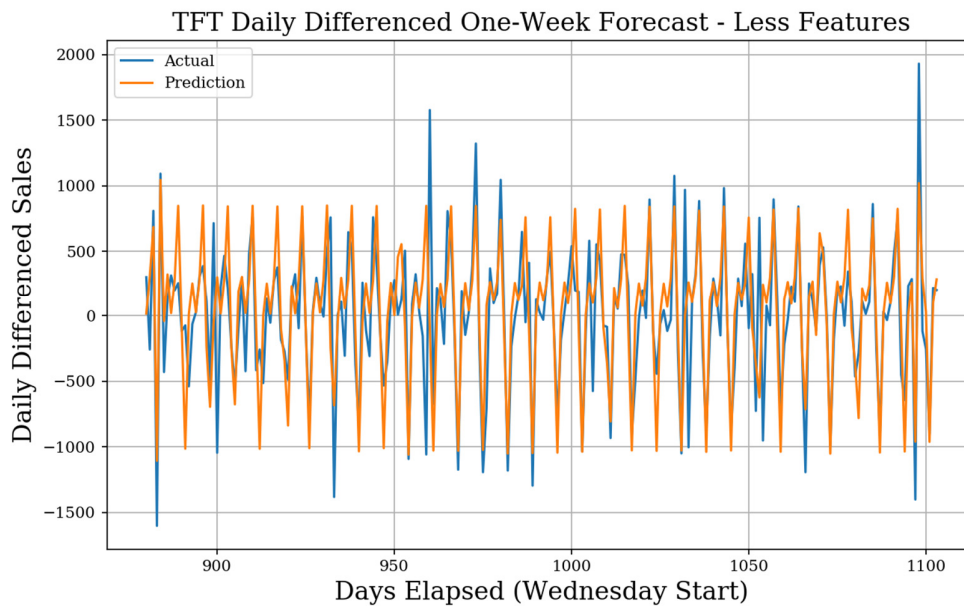

**Supplementary Figure S42:** Transformer Less Features Daily Differenced One-Week Forecast. The best start day MAE of 285, sMAPE of 108.1%, and gMAE of 179 are found when starting predictions on Wednesday. A mean MAE of 294 and a standard deviation of 7.2 are found with 13 features.

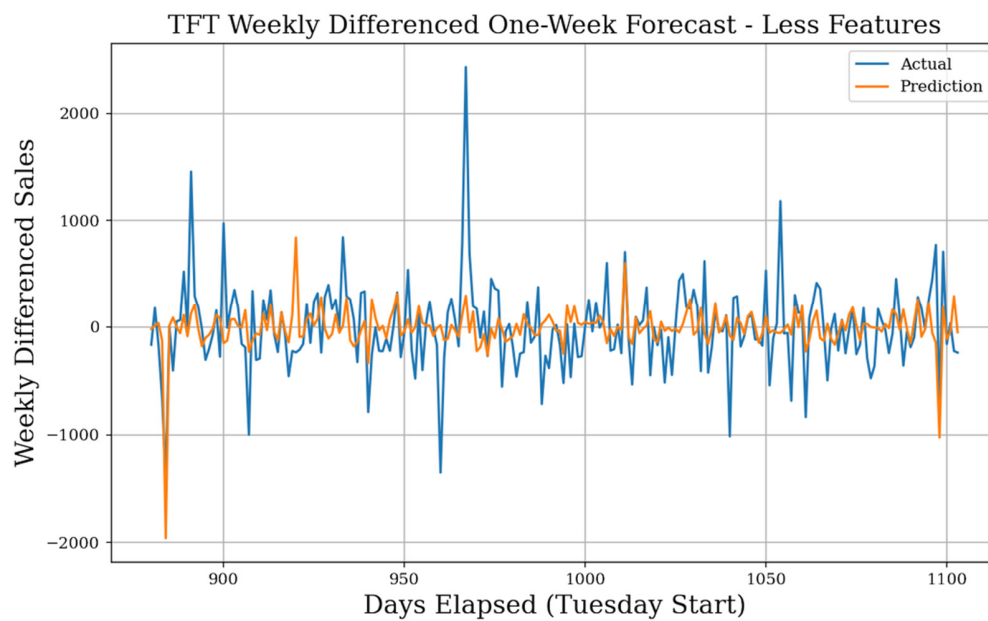

**Supplementary Figure S43:** Transformer Less Features Weekly Differenced One-Week Forecast. The best start day MAE of 263, sMAPE of 137.1%, and gMAE of 147 are found when starting predictions on Tuesday. A mean MAE of 278 and a standard deviation of 2.95 are found with less features..hgfhgf ...h.
